# Supplementary material for: Essential Metabolites of Mycobacterium tuberculosis and Their Mimics
Source: PubMed Central journal article supplement — mBio. 2011 Feb 1;2(1):e00301-10. doi: 10.1128/mBio.00301-10 (PMC3031304; doi:10.1128/mbio.00301-10), 2011-02-01
Supplement: mBio00301-10-s02.pdf [file mBio00301-10-s02.pdf]

Supplemental figure 2

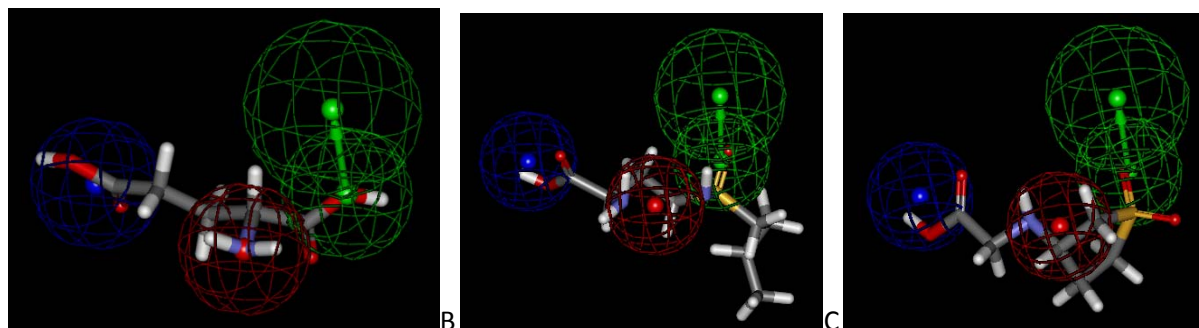

L-glutamate 3D pharmacophore and mimics. Panel A shows L-glutamate mapped to the features that represent the 3D pharmacophore (blue = negative ionizable, Red = positive ionizable and green = hydrogen bond acceptor). Panel B shows L-Methionine-S-sulfoximine mapped to the pharmacophore, fit value 2.1, Panel C shows JFD01307SC mapped to the pharmacophore, fit value 2.08.
