# Supplementary material for: Essential Metabolites of Mycobacterium tuberculosis and Their Mimics
Source: PubMed Central journal article supplement — mBio. 2011 Feb 1;2(1):e00301-10. doi: 10.1128/mBio.00301-10 (PMC3031304; doi:10.1128/mbio.00301-10), 2011-02-01
Supplement: mBio00301-10-s03.pdf [file mBio00301-10-s03.pdf]

| <u>JHU ID</u>  | <u>ORF size</u> | <u>POI</u> | <u>ORF description</u>                         | <u>MT#</u> | <u>Rv#</u> |
|----------------|-----------------|------------|------------------------------------------------|------------|------------|
| JHU10012a-130  | 153             | 130        | Hypothetical protein                           | MT0012     |            |
| JHU0013-603    | 699             | 603        | Glutamine amidotransferase                     | MT0016     | Rv0013     |
| JHU0031a-142   | 144             | 142        | Hypothetical protein                           | MT0031     |            |
| JHU0052-621    | 639             | 621        | Conserved hypothetical protein                 | MT0058     | Rv0052     |
| JHU0052-623    | 639             | 623        | Conserved hypothetical protein                 | MT0058     | Rv0052     |
| JHU0056-457    | 459             | 457        | Ribosomal protein L9                           | MT0062     | Rv0056     |
| JHU0069c-1324  | 1386            | 1324       | L-serine dehydratase                           | MT0075     | Rv0069c    |
| JHU0117-877    | 951             | 877        | "Transcriptional regulator, LysR family (oxyS) | MT0125.1   | Rv0117     |
| JHU0133-514    | 606             | 514        | Puromycin N-acetyltransferase, putative        | MT0141     | Rv0133     |
| JHU0133-517    | 606             | 517        | "Puromycin N-acetyltransferase, putative"      | MT0141     | Rv0133     |
| JHU0157-1365   | 1428            | 1365       | "NAD(P) transhydrogenase, beta subunit"        | MT0165     | Rv0157     |
| JHU0157-1366   | 1428            | 1366       | NAD(P) transhydrogenase, beta subunit          | MT0165     | Rv0157     |
| JHU0165c-610   | 672             | 610        | Transcriptional regulator                      | MT0174     | Rv0165c    |
| JHU0177-505    | 555             | 505        | Hypothetical protein                           | MT0186     | Rv0177     |
| JHU0236c-4200  | 4203            | 4200       | Conserved hypothetical protein                 | MT0247     | Rv0236c    |
| JHU0251c-391   | 480             | 391        | "Heat shock protein, HSP20 family (hsp)"       | MT0265     | Rv0251c    |
| JHU0251c-430   | 480             | 430        | Heat shock protein, HSP20 family               | MT0265     | Rv0251c    |
| JHU0270.2a-207 | 249             | 207        | Hypothetical protein                           | MT0270.2   |            |
| JHU0271c-2096  | 2196            | 2096       | Acyl-CoA dehydrogenase                         | MT0284     | Rv0271c    |
| JHU0271c-2125  | 2196            | 2125       | Conserved hypothetical protein                 | MT0284     | Rv0271c    |
| JHU0321-566    | 573             | 566        | Deoxycytidine triphosphate deaminase (dcd)     | MT0336     | Rv0321     |
| JHU0321-571    | 573             | 571        | Deoxycytidine triphosphate deaminase           | MT0336     | Rv0321     |
| JHU0337c-1288  | 1290            | 1288       | Aspartate aminotransferase (aspC)              | MT0351     | Rv0337c    |
| JHU0365c-1033  | 1131            | 1033       | Fructose-bisphosphate aldolase family prote    | MT0381     | Rv0365c    |
| JHU0407.1a-247 | 249             | 247        | Hypothetical protein                           | MT0407.1   |            |
| JHU0400c-1121  | 1191            | 1121       | Glutaryl-CoA dehydrogenase, putative           | MT0410     | Rv0400c    |
| JHU0413a-853   | 885             | 853        | IS6110, transposase                            | MT0413     |            |
| JHU0431a-152   | 153             | 152        | Hypothetical protein                           | MT0431     |            |
| JHU0459-397    | 492             | 397        | Conserved hypothetical protein                 | MT0475     | Rv0459     |
| JHU0468-856    | 861             | 856        | 3-hydroxyacyl-CoA dehydrogenase family pr      | MT0484     | Rv0468     |
| JHU0469-877    | 878             | 877        | Mycolic acid synthase, authentic frameshift    | MT0485     | Rv0469     |
| JHU0474-343    | 423             | 343        | "Transcriptional regulator, Pbs X family (HP)" | MT0491     | Rv0474     |
| JHU0474-348    | 423             | 348        | "Transcriptional regulatory protein, PbsX fan  | MT0491     | Rv0474     |
| JHU0495c-807   | 891             | 807        | Conserved hypothetical protein                 | MT0515     | Rv0495c    |
| JHU0500A-220   | 237             | 220        | Excisionase putative (b/w Rv500/501)           | MT0521     | Rv0500A    |
| JHU0600c-1122  | 1134            | 1122       | Sensor histidine kinase                        | MT0630     | Rv0600c    |
| JHU0634c-945   | 714             | 945        | Metallo-beta-lactamase superfamily protein     | MT0662     | Rv0634c    |
| JHU0653c-768   | 774             | 768        | Transcriptional repressor                      | MT0682     | Rv0653c    |
| JHU668-3877    | 3951            | 3877       | RNA polymerase, B'-subunit (rpoC)              | MT0696     | Rv0668     |
| JHU0692-250    | 312             | 250        | Conserved hypothetical protein                 | MT0719.2   | Rv0692     |
| JHU0733-545    | 546             | 545        | Adenylate kinase                               | MT0757     | Rv0733     |
| JHU0751c-805   | 885             | 805        | 3-hydroxyisobutyrate dehydrogenase             | MT0775     | Rv0751c    |
| JHU0768-1436   | 1470            | 1436       | Aldehyde dehydrogenase (aldA)                  | MT0792     | Rv0768     |
| JHU0786c-567   | 639             | 567        | Conserved hypothetical protein                 | MT0810     | Rv0786c    |
| JHU0798c-311   | 798             | 311        | Bacteriocin CFP29                              | MT0819     | Rv0798c    |
| JHU0798c-732   | 798             | 732        | Bacteriocin CFP29                              | MT0819     | Rv0798c    |

|                |      |      |                                               |          |         |
|----------------|------|------|-----------------------------------------------|----------|---------|
| JHU0820-754    | 777  | 754  | Phosphate ABC transporter                     | MT0842   | Rv0820  |
| JHU0825c-658   | 720  | 658  | Hypothetical protein                          | MT0847   | Rv0825c |
| JHU0825c-658   | 720  | 658  | Hypothetical protein                          | MT0847   | Rv0825c |
| JHU0851c-737   | 837  | 737  | "Oxidoreductase, short chain dehydrogenase    | MT0874   | Rv0851c |
| JHU0865-404    | 483  | 404  | Molybdopterin biosynthesis protein            | MT0888   | Rv0865  |
| JHU0868c-255   | 279  | 255  | Conserved hypothetical protein                | MT0891   | Rv0868c |
| JHU0919-458    | 501  | 458  | Conserved hypothetical protein                | MT0945   | Rv0919  |
| JHU0922-1138   | 1653 | 1138 | IS1535, transposase                           | MT0949   | Rv0922  |
| JHU0922-1584   | 1653 | 1584 | "IS1535, transposase"                         | MT0949   | Rv0922  |
| JHU0958-1323   | 1380 | 1323 | Magnesium chelatase                           | MT0985   | Rv0958  |
| JHU0990c-612   | 657  | 612  | Hypothetical protein                          | MT1019   | Rv0990c |
| JHU1030-2051   | 2130 | 2051 | Potassium-transporting ATPase, B subunit      | MT1059   | Rv1030  |
| JHU1037c-284   | 285  | 284  | Conserved hypothetical protein                | MT1066   | Rv1037c |
| JHU1072a-925   | 928  | 925  | Hypothetical protein                          | MT1072   |         |
| JHU1083.2a-284 | 339  | 284  | Hypothetical protein                          | MT1083.2 |         |
| JHU1080c-493   | 495  | 493  | Transcriptional elongation factor, GreA       | MT1111   | Rv1080c |
| JHU1134-190    | 237  | 190  | Hypothetical protein                          | MT1167   | Rv1134  |
| JHU1136-341    | 342  | 341  | Enoyl-CoA hydratase-isomerase                 | MT1169.1 | Rv1136  |
| JHU1144-671    | 753  | 671  | Oxidoreductase                                | MT1177   | Rv1144  |
| JHU1181a-323   | 333  | 323  | Hypothetical protein                          | MT1181   |         |
| JHU1181a-323   | 333  | 323  | Hypothetical protein                          | MT1181   |         |
| JHU1181a-323   | 333  | 323  | Hypothetical protein                          | MT1181   |         |
| JHU1157c-1113  | 1116 | 1113 | Hypothetical protein                          | MT1193   | Rv1157c |
| JHU1159-1213   | 1299 | 1213 | Hypothetical protein                          | MT1195   | Rv1159  |
| JHU1160-425    | 426  | 425  | MutT/nudix family protein                     | MT1197   | Rv1160  |
| JHU1170-910    | 912  | 910  | LmbE related protein                          | MT1207   | Rv1170  |
| JHU1187-1609   | 1632 | 1609 | Delta-1-pyrroline-5-carboxylate dehydrogenase | MT1224   | Rv1187  |
| JHU1264.1a-580 | 594  | 580  | Hypothetical protein                          | MT1264.1 |         |
| JHU1257c-1280  | 1368 | 1280 | Oxidoreductase, FAD-binding                   | MT1296   | Rv1257c |
| JHU1269c-396   | 423  | 396  | Hypothetical protein                          | MT1307   | Rv1269c |
| JHU1303-431    | 486  | 431  | Conserved hypothetical protein                | MT1343   | Rv1303  |
| JHU1317c-1417  | 1491 | 1417 | Regulatory protein Ada, putative              | MT1358   | Rv1317c |
| JHU1317c-1417  | 1491 | 1417 | Regulatory protein Ada, putative              | MT1358   | Rv1317c |
| JHU1317c-1418  | 1491 | 1418 | "Regulatory protein Ada, putative"            | MT1358   | Rv1317c |
| JHU1337-608    | 684  | 608  | Rhomboid family protein                       | MT1378   | Rv1337  |
| JHU1337-608    | 684  | 608  | Rhomboid family protein                       | MT1378   | Rv1337  |
| JHU1338-815    | 816  | 815  | Glutamate acemase (mur1)                      | MT1379   | Rv1338  |
| JHU1338-815    | 816  | 815  | Glutamate recemase (murl)                     | MT1379   | Rv1338  |
| JHU1373-881    | 963  | 881  | "Sulfotransferase, putative"                  | MT1418   | Rv1373  |
| JHU1386-257    | 309  | 257  | PE family protein                             | MT1430   | Rv1386  |
| JHU1386-305    | 309  | 305  | PE family protein                             | MT1430   | Rv1386  |
| JHU1391-1249   | 1257 | 1249 | DNA-pantothenate metabolism flavoprotein      | MT1436   | Rv1391  |
| JHU01391-1249  | 1257 | 1249 | DNA-pantothenate metabolism flavoprotein      | MT1436   | Rv1391  |
| JHU1403c-766   | 825  | 766  | Methyltransferase                             | MT1447   | Rv1403c |
| JHU1472-857    | 858  | 857  | Enoyl-CoA hydratase/isomerase family prote    | MT1518   | Rv1472  |
| JHU1560.1a-342 | 420  | 342  | Hypothetical protein                          | MT1560.1 |         |
| JHU1560.1a-412 | 420  | 412  | Hypothetical protein                          | MT1560.1 |         |

|                |      |      |                                                        |          |         |
|----------------|------|------|--------------------------------------------------------|----------|---------|
| JHU1560.1a-417 | 420  | 417  | Hypothetical protein                                   | MT1560.1 |         |
| JHU1571a-191   | 201  | 191  | Hypothetical protein                                   | MT1571   |         |
| JHU1530-1047   | 1104 | 1047 | Zinc-binding dehydrogenase                             | MT1581   | Rv1530  |
| JHU1530-1047   | 1104 | 1047 | Zinc-binding dehydrogenase                             | MT1581   | Rv1530  |
| JHU1602a-258   | 288  | 258  | Hypothetical protein                                   | MT1602   |         |
| JHU1552-1711   | 1752 | 1711 | "Fumarate reductase, flavoprotein sub $\alpha$ "       | MT1603   | Rv1552  |
| JHU1556-579    | 609  | 579  | "Transcriptional regulator, TetR family"               | MT1607   | Rv1556  |
| JHU1596-882    | 888  | 882  | Nicotinate-nucleotide pyrophosphorylase (n             | MT1632   | Rv1596  |
| JHU1627c-1208  | 1209 | 1208 | Nonspecific lipid-transfer protein                     | MT1663   | Rv1627c |
| JHU1646-572    | 933  | 572  | PE family protein                                      | MT1684   | Rv1646  |
| JHU1646-932    | 933  | 932  | PE family protein                                      | MT1684   | Rv1646  |
| JHU1671-412    | 459  | 412  | Hypothetical protein                                   | MT1709   | Rv1671  |
| JHU1671-412    | 459  | 412  | Hypothetical protein                                   | MT1709   | Rv1671  |
| JHU1742a-175   | 216  | 175  | Hypothetical protein                                   | MT1742   |         |
| JHU1771.1a-105 | 120  | 105  | Hypothetical protein                                   | MT1771.1 |         |
| JHU1753c-3317  | 3318 | 3317 | PPE family protein                                     | MT1796   | Rv1753c |
| JHU1808a-233   | 234  | 233  | Hypothetical protein                                   | MT1808   |         |
| JHU1775-749    | 819  | 749  | Conserved hypothetical protein                         | MT1825   | Rv1775  |
| JHU1776c-482   | 561  | 482  | "Transcriptional regulator, TetR family"               | MT1826   | Rv1776c |
| JHU1788-240    | 300  | 240  | PE family protein                                      | MT1837   | Rv1788  |
| JHU1792-253    | 297  | 253  | Conserved hypothetical protein                         | MT1841   | Rv1792  |
| JHU1822-574    | 630  | 574  | CDP-diaclyglycerol--glycerol-3-phosphate 3- $\epsilon$ | MT1870   | Rv1822  |
| JHU1829-1292   | 495  | 1292 | Conserved Hypothetical protein                         | MT1877   | Rv1829  |
| JHU1849-286    | 315  | 286  | "Urease, beta subunit (ureB)"                          | MT1897   | Rv1849  |
| JHU1855c-839   | 924  | 839  | "Oxidoreductase, putative"                             | MT1903   | Rv1855c |
| JHU1881c-376   | 465  | 376  | Lipoprotein antigen                                    | MT1930   | Rv1881c |
| JHU1881c-376   | 465  | 376  | "Lipoprotein antigen, 22 kDa (lppE)"                   | MT1930   | Rv1881c |
| JHU1881c-377   | 465  | 377  | "Lipoprotein antigen, 22 kDa (lppE)"                   | MT1930   | Rv1881c |
| JHU1890c-517   | 612  | 517  | Hypothetical protein                                   | MT1940   | Rv1890c |
| JHU1897c-470   | 486  | 470  | Conserved hypothetical protein                         | MT1948   | Rv1897c |
| JHU1926c-400   | 480  | 400  | Hypothetical protein                                   | MT1977   | Rv1926c |
| JHU1933c-997   | 1092 | 997  | "Acyl-CoA dehydrogenase, putative"                     | MT1983   | Rv1933c |
| JHU1933c-997   | 1092 | 997  | "Acyl-CoA dehydrogenase, putative"                     | MT1983   | Rv1933c |
| JHU1934c-1141  | 1230 | 1141 | "Acyl-CoA dehydrogenase, FadE17"                       | MT1984   | Rv1934c |
| JHU1970-1083   | 1134 | 1083 | Virulance factor mce family protein                    | MT2022   | Rv1970  |
| JHU1985c-878   | 912  | 878  | "Transcriptional regulator, LysR family (HP)"          | MT2039   | Rv1985c |
| JHU1987-416    | 429  | 416  | Chitinase-related protein                              | MT2041   | Rv1987  |
| JHU2003c-772   | 858  | 772  | Conserved hypothetical protein                         | MT2059   | Rv2003c |
| JHU2012-442    | 495  | 442  | Hypothetical protein                                   | MT2067   | Rv2012  |
| JHU2022c-605   | 606  | 605  | Conserved hypothetical protein                         | MT2078   | Rv2022c |
| JHU2028c-833   | 840  | 833  | Universal stress protein family                        | MT2087   | Rv2028c |
| JHU2102-792    | 834  | 792  | Conserved hypothetical protein                         | MT2162   | Rv2102  |
| JHU2165-249    | 297  | 249  | Hypothetical protein                                   | MT2165   |         |
| JHU2165.1a-97  | 99   | 97   | Hypothetical protein                                   | MT2165.1 |         |
| JHU2110c-847   | 876  | 847  | "proteasome, beta subunit "                            | MT2170   | Rv2110c |
| JHU2120c-511   | 516  | 511  | Hypothetical protein                                   | MT2180   | Rv2120c |
| JHU2139-1072   | 1074 | 1072 | Dihydroorotate dehydrogenase                           | MT2197   | Rv2139  |

|               |      |      |                                              |          |         |
|---------------|------|------|----------------------------------------------|----------|---------|
| JHU2147c-723  | 726  | 723  | Conserved hypothetical protein               | MT2206   | Rv2147c |
| JHU2169c-335  | 405  | 335  | Conserved hypothetical protein               | MT2225   | Rv2169c |
| JHU2169c-404  | 405  | 404  | Conserved hypothetical protein               | MT2225   | Rv2169c |
| JHU2197c-602  | 645  | 602  | Hypothetical protein                         | MT2253   | Rv2197c |
| JHU2197c-602  | 645  | 602  | Hypothetical protein                         | MT2253   | Rv2197c |
| JHU2200c-1085 | 1092 | 1085 | "Cytochrome c oxidase, subunit II"           | MT2256   | Rv2200c |
| JHU2228c-1088 | 1095 | 1088 | Phosphoglycerate mutase family protein       | MT2287   | Rv2228c |
| JHU2228c-1093 | 1095 | 1093 | Phosphoglycerate mutase family protein (HP   | MT2287   | Rv2228c |
| JHU2242-1227  | 1245 | 1227 | Conserved hypothetical protein               | MT2302   | Rv2242  |
| JHU2242-1228  | 1245 | 1228 | Conserved hypothetical protein               | MT2302   | Rv2242  |
| JHU2247-1420  | 1422 | 1420 | Propionyl-CoA carboxylase                    | MT2307   | Rv2247  |
| JHU2295-507   | 564  | 507  | Conserved hypothetical protein               | MT2352   | Rv2295  |
| JHU2301-601   | 660  | 601  | Serine esterase, cutinase family             | MT2358   | Rv2301  |
| JHU2306c-625  | 627  | 625  | Hypothetical protein                         | MT2363   | Rv2306c |
| JHU2396a-169  | 171  | 169  | Hypothetical protein                         | MT2396   |         |
| JHU2341-360   | 420  | 360  | Lipoprotein (lppQ)                           | MT2406   | Rv2341  |
| JHU2341-381   | 420  | 381  | Lipoprotein (lppQ)                           | MT2406   | Rv2341  |
| JHU2347c-251  | 297  | 251  | Conserved hypothetical protein               | MT2412   | Rv2347c |
| JHU2350c-1458 | 1539 | 1458 | Phospholipase C                              | MT2415   | Rv2350c |
| JHU2421a-256  | 300  | 256  | Conserved hypothetical protein               | MT2421   |         |
| JHU2455a-208  | 210  | 208  | Hypothetical protein                         | MT2455   |         |
| JHU2467a-164  | 165  | 164  | Hypothetical protein                         | MT2467   |         |
| JHU2414c-1508 | 1554 | 1508 | Hypothetical protein                         | MT2487   | Rv2414c |
| JHU2414c-1509 | 1554 | 1509 | Hypothetical protein                         | MT2487   | Rv2414c |
| JHU2453c-605  | 606  | 605  | Molybdopterin-guanine dinucleotide biosynt   | MT2528   | Rv2453c |
| JHU2463-1183  | 1185 | 1183 | Esterase (lipP)                              | MT2538   | Rv2463  |
| JHU2491-605   | 624  | 605  | Conserved hypothetical protein               | MT2566   | Rv2491  |
| JHU2519-1446  | 1506 | 1446 | PE family protein (PPE)                      | MT2595   | Rv2519  |
| JHU2546-384   | 417  | 384  | Hypothetical protein                         | MT2622   | Rv2546  |
| JHU2574-466   | 504  | 466  | Hypothetical protein                         | MT2650   | Rv2574  |
| JHU2574-466   | 504  | 466  | Hypothetical protein                         | MT2650   | Rv2574  |
| JHU2578c-943  | 1023 | 943  | Conserved hypothetical protein               | MT2655   | Rv2578c |
| JHU2603c-674  | 756  | 674  | Conserved Hypothetical protein               | MT2678   | Rv2603c |
| JHU2616-483   | 501  | 483  | Conserved hypothetical protein               | MT2691.1 | Rv2616  |
| JHU2659c-1131 | 1161 | 1131 | Integrase                                    | MT2735   | Rv2659c |
| JHU2665-281   | 282  | 281  | Hypothetical protein                         | MT2739   | Rv2665  |
| JHU2691-586   | 684  | 586  | Ceob protein                                 | MT2765   | Rv2691  |
| JHU2736c-536  | 537  | 536  | RecX protein                                 | MT2805   | Rv2736c |
| JHU2766c-731  | 783  | 731  | "Oxidoreductase, short-chain dehydrogenase   | MT2836   | Rv2766c |
| JHU2772c-386  | 474  | 386  | Conserved hypothetical protein               | MT2842   | Rv2772c |
| JHU2784c-456  | 516  | 456  | HP (contains signal for LPPU-lipoprotein att | MT2854   | Rv2784c |
| JHU2807-1153  | 1155 | 1153 | Conserved hypothetical protein               | MT2874   | Rv2807  |
| JHU2860c-1288 | 1374 | 1288 | "Glutamine synthetase, putative (glnA4)"     | MT2928   | Rv2860c |
| JHU2860c-1353 | 1374 | 1353 | "Glutamine synthetase, putative (glnA4)"     | MT2928   | Rv2860c |
| JHU2867c-763  | 855  | 763  | Acyltransferase                              | MT2935   | Rv2867c |
| JHU2869c-626  | 1215 | 626  | PDZ domain protein                           | MT2937   | Rv2869c |
| JHU2869c-1158 | 1215 | 1158 | PDZ domain family protein                    | MT2937   | Rv2869c |

|               |      |      |                                                         |        |         |
|---------------|------|------|---------------------------------------------------------|--------|---------|
| JHU2872-439   | 444  | 439  | Hypothetical protein                                    | MT2939 | Rv2872  |
| JHU2878c-440  | 534  | 440  | Soluble secreted antigen MPT53 precursor                | MT2946 | Rv2878c |
| JHU2915c-971  | 1056 | 971  | Hypothetical protein                                    | MT2983 | Rv2915c |
| JHU2922A-280  | 282  | 280  | Acylphosphatase                                         | MT2991 | Rv2922A |
| JHU2962c-1348 | 1350 | 1348 | UDP-glucuronosyltransferase and UDP-glucosyltransferase | MT3038 | Rv2962c |
| JHU2999-902   | 990  | 902  | Hypothetical protein                                    | MT3078 | Rv2999  |
| JHU3000-605   | 660  | 605  | ABC transporter, ATP-binding protein                    | MT3080 | Rv3000  |
| JHU3020c-262  | 309  | 262  | PE family protein                                       | MT3105 | Rv3020c |
| JHU3020c-263  | 309  | 263  | PE family protein                                       | MT3105 | Rv3020c |
| JHU3038c-972  | 984  | 972  | Hypothetical protein                                    | MT3123 | Rv3038c |
| JHU3039c-764  | 765  | 764  | Enoyl-CoA hydratase/isomerase family protein            | MT3124 | Rv3039c |
| JHU3040c-823  | 867  | 823  | Conserved hypothetical protein                          | MT3125 | Rv3040c |
| JHU3044-982   | 984  | 982  | "ABC transporter, periplasmic subunit binding protein"  | MT3129 | Rv3044  |
| JHU3048c-974  | 975  | 974  | ribonucleoside-diphosphate reductase                    | MT3133 | Rv3048c |
| JHU3055-740   | 831  | 740  | Transcriptional regulator                               | MT3141 | Rv3055  |
| JHU3055-740   | 831  | 740  | Transcriptional regulator                               | MT3141 | Rv3055  |
| JHU3058c-713  | 714  | 713  | "Transcriptional regulator, TetR family"                | MT3144 | Rv3058c |
| JHU3067-371   | 411  | 371  | Hypothetical protein                                    | MT3152 | Rv3067  |
| JHU3096-1061  | 1140 | 1061 | Hypothetical protein                                    | MT3180 | Rv3096  |
| JHU3145-346   | 387  | 346  | NADH dehydrogenase I, A subunit                         | MT3233 | Rv3145  |
| JHU3145-352   | 387  | 352  | NADH dehydrogenase I, A subunit                         | MT3233 | Rv3145  |
| JHU3170-1361  | 1365 | 1361 | "Amine oxidase, Flavin-containing"                      | MT3259 | Rv3170  |
| JHU3183-308   | 330  | 308  | Hypothetical protein                                    | MT3275 | Rv3183  |
| JHU3183-310   | 330  | 310  | Hypothetical protein                                    | MT3275 | Rv3183  |
| JHU3213c-768  | 801  | 768  | Soj family protein                                      | MT3309 | Rv3213c |
| JHU3220c-1428 | 1506 | 1428 | Sensor histidine kinase                                 | MT3316 | Rv3220c |
| JHU3220c-1428 | 1506 | 1428 | Serine histidine kinase                                 | MT3316 | Rv3220c |
| JHU3234c-726  | 816  | 726  | Hypothetical protein                                    | MT3331 | Rv3234c |
| JHU3241c-583  | 660  | 583  | S30AE family protein                                    | MT3339 | Rv3241c |
| JHU3298c-824  | 915  | 824  | Esterase                                                | MT3397 | Rv3298c |
| JHU3312A-344  | 345  | 344  | Hypothetical protein                                    | MT3413 | Rv3312A |
| JHU3322c-552  | 615  | 552  | Hypothetical protein                                    | MT3423 | Rv3322c |
| JHU3377c-1449 | 1506 | 1449 | Cyclase putative                                        | MT3487 | Rv3377c |
| JHU3377c-1470 | 1506 | 1470 | Cyclase putative                                        | MT3487 | Rv3377c |
| JHU3388-2326  | 2328 | 2326 | PE_PGRS                                                 | MT3495 | Rv3388  |
| JHU3399-1046  | 1047 | 1046 | Conserved hypothetical protein                          | MT3507 | Rv3399  |
| JHU3405c-542  | 567  | 542  | "Transcriptional regulator, TetR family"                | MT3513 | Rv3405c |
| JHU3412-340   | 411  | 340  | Conserved hypothetical protein                          | MT3521 | Rv3412  |
| JHU3416-307   | 309  | 307  | WhiB-related protein                                    | MT3525 | Rv3416  |
| JHU3493c-709  | 729  | 709  | Hypothetical protein                                    | MT3597 | Rv3493c |
| JHU3501c-674  | 714  | 674  | Conserved hypothetical protein                          | MT3605 | Rv3501c |
| JHU3523-1140  | 1185 | 1140 | Nonspecific lipid-transfer protein                      | MT3623 | Rv3523  |
| JHU3536c-350  | 786  | 350  | 2-keto-4-pentenoate hydratase                           | MT3640 | Rv3536c |
| JHU3536c-785  | 786  | 785  | 2-Keto-4-pentenoate hydratase                           | MT3640 | Rv3536c |
| JHU3539-1438  | 1440 | 1438 | PPE family protein                                      | MT3643 | Rv3539  |
| JHU3600c-777  | 819  | 777  | "Transcriptional activator, putative, Baf family"       | MT3706 | Rv3600c |
| JHU3612c-279  | 330  | 279  | Hypothetical protein                                    | MT3715 | Rv3612c |

|                |      |      |                                             |          |         |
|----------------|------|------|---------------------------------------------|----------|---------|
| JHU3622c-260   | 300  | 260  | PE family protein                           | MT3724   | Rv3622c |
| JHU3624c-602   | 609  | 602  | Hypoxanthine/guanine phosphoribosyltransf   | MT3726   | Rv3624c |
| JHU3660c-734   | 786  | 734  | Conserved hypothetical protein              | MT3760   | Rv3660c |
| JHU3770a-681   | 711  | 681  | Hypothetical protein                        | MT3770   |         |
| JHU3688c-386   | 465  | 386  | Conserved hypothetical protein              | MT3790   | Rv3688c |
| JHU3690-651    | 702  | 651  | Hypothetical protein                        | MT3792   | Rv3690  |
| JHU3729-671    | 2331 | 671  | MoaA-nifB-pqqE family protein               | MT3833   | Rv3729  |
| JHU3729-2301   | 2331 | 2301 | MoaA/nifB/pqqE family protein               | MT3833   | Rv3729  |
| JHU3763-388    | 480  | 388  | Protein family HMM PF05481                  | MT3870   | Rv3763  |
| JHU3770A-158   | 183  | 158  | Hypothetical protein                        | MT3878   | Rv3770A |
| JHU3783-840    | 843  | 840  | "O antigen export system, permease protein  | MT3892   | Rv3783  |
| JHU3802c-1005  | 1011 | 1005 | Hypothetical protein                        | MT3909   | Rv3802c |
| JHU3817-679    | 756  | 679  | Aminoglycoside phosphotransferase           | MT3925.1 | Rv3817  |
| JHU3838c-876   | 966  | 876  | Prephenate dehydratase                      | MT3946   | Rv3838c |
| JHU3872-298    | 339  | 298  | Hypothetical protein                        | MT3986   | Rv3872  |
| JHU3899c-1159  | 1233 | 1159 | Hypothetical protein                        | MT4016   | Rv3899c |
| JHU3901c-366   | 450  | 366  | Hypothetical protein                        | MT4018   | Rv3901c |
| JHU3904c-233   | 273  | 233  | Hypothetical protein                        | MT4023   | Rv3904c |
| JHU3910-3223   | 3555 | 3223 | Membrane protein                            | MT4029   | Rv3910  |
| JHU3910-3486   | 3555 | 3486 | Conserved hypothetical protein              | MT4029   | Rv3910  |
| JHU3911-559    | 591  | 559  | "RNA polymerase sigma 70 factor, ECF family | MT4030   | Rv3911  |
| JHU4035.1a-244 | 288  | 244  | Hypothetical protein                        | MT4035.1 |         |

Supporting Table 1: This table lists 212 unique genes that were disrupted by Himar1 transposon by insertion in the distal region only. This table lists 256 unique mutants yet represents 212 genes only as some genes have been hit more than once in the distal region.

JHU\_ID= a unique identificaiton # for each mutant.

ORF size = length of the gene

POI= **P**oint **O**f **I**nsertion : This is the position of the base, from the putative translation start site, at which the Himar1 transposon has inserted.

MT # = Annotation number assigned to each open reading frame by CDC1551 annotation database ([www.jcvi.org](http://www.jcvi.org)).

Rv# = Annotation number assigned to each open reading frame by CDC1551 annotation database (<http://tuberculist.epfl.ch/index.html>)
