# Supplementary material for: Essential Metabolites of Mycobacterium tuberculosis and Their Mimics
Source: PubMed Central journal article supplement — mBio. 2011 Feb 1;2(1):e00301-10. doi: 10.1128/mBio.00301-10 (PMC3031304; doi:10.1128/mbio.00301-10), 2011-02-01
Supplement: mBio00301-10-s04.pdf [file mBio00301-10-s04.pdf]

| Molecule                                            | Structure                                                                           | CDD Number | Similarity Score (%) | Alamar Blue: Percent | TB Prathiparti MIC B: MIC | TB Prathiparti MIC A: MIC | MTb (H37Rv) Inhibitory | MTb (H37Rv) Inhibitory | MTb (H37Rv) Inhibitory Dose |
|-----------------------------------------------------|-------------------------------------------------------------------------------------|------------|----------------------|----------------------|---------------------------|---------------------------|------------------------|------------------------|-----------------------------|
| <b>ESSENTIAL MOLECULE: UDP-GlcNAc-enol pyruvate</b> |                                                                                     |            |                      |                      |                           |                           |                        |                        |                             |
| UDP-GlcNAc-enol pyruvate                            | 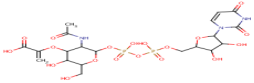   |            | 100                  |                      |                           |                           |                        |                        |                             |
| UDP-N-acetyl-muramate                               |    |            | 98                   |                      |                           |                           |                        |                        |                             |
| UDP-N-acetyl-D-glucosamine                          |    |            | 95                   |                      |                           |                           |                        |                        |                             |
| UDP-N-acetylmuramoyl-L-alanine                      |    |            | 89                   |                      |                           |                           |                        |                        |                             |
| JHU- 12039                                          |    | CDD-42391  | 73                   |                      |                           |                           |                        |                        |                             |
| JHU- 2276                                           |    | CDD-128568 | 70                   |                      |                           |                           |                        |                        |                             |
| TBL-7912                                            |    |            | 67                   |                      |                           |                           |                        |                        |                             |
| TBL-7912                                            |  | CDD-343091 | 67                   |                      |                           |                           |                        |                        |                             |
| ST013879                                            |  | CDD-45534  | 64                   |                      |                           |                           |                        |                        |                             |
| Nadide                                              |  | CDD-1644   | 61                   |                      |                           |                           |                        |                        |                             |
| Nadide                                              |  | CDD-1644   | 61                   | -3                   |                           |                           |                        |                        |                             |

|                         |                                                                                     |            |    |    |
|-------------------------|-------------------------------------------------------------------------------------|------------|----|----|
| JHU- 1441               | 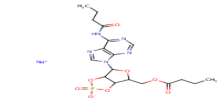   | CDD-128664 | 60 |    |
| SMR000058940            |    |            | 60 |    |
| SMR000058940            |    | CDD-303017 | 60 |    |
| Bucladesine sodium salt |    | CDD-1701   | 60 |    |
| Bucladesine sodium salt |    | CDD-1701   | 60 | -1 |
| ST075421                |    | CDD-45861  | 60 |    |
| JHU- 178                |    | CDD-42157  | 60 |    |
| ST057097                |    | CDD-45679  | 60 |    |
| JHU- 6717               |   | CDD-47258  | 60 |    |
| ST057081                |  | CDD-44446  | 59 |    |
| TBL-8595                |  | CDD-343074 | 59 |    |
| TBL-8595                |  | CDD-343074 | 59 |    |
| JHU- 2633               |  | CDD-45948  | 58 |    |

|                  |                                                                                     |            |    |          |
|------------------|-------------------------------------------------------------------------------------|------------|----|----------|
| JHU- 5184        | 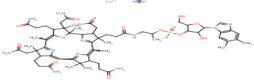   | CDD-45951  | 58 |          |
| Hydroxocobalamin |    | CDD-891    | 58 |          |
| JHU- 2457        |    | CDD-46421  | 58 |          |
| JHU- 4913        |    | CDD-47349  | 58 |          |
| JHU- 10786       |    | CDD-45950  | 58 |          |
| Cyanocobalamin   |    | CDD-1384   | 58 |          |
| Cyanocobalamin   |    | CDD-1384   | 58 | 33       |
| TBL-2459         |    | CDD-341600 | 58 |          |
| SMR000326870     |   |            | 58 |          |
| SMR000326870     |  | CDD-298228 | 58 |          |
| ST013860         |  | CDD-45528  | 57 |          |
| 351369           |  | CDD-51464  | 57 | 0.131533 |
| SMR000326853     |  |            | 57 |          |

|                       |                                                                                     |            |    |          |
|-----------------------|-------------------------------------------------------------------------------------|------------|----|----------|
| SMR000326853          | 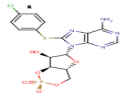   | CDD-215826 | 57 |          |
| 351366                |    | CDD-51487  | 56 | 0.154921 |
| 351368                |    | CDD-53049  | 56 | 7.86158  |
| SMR000450983          |    |            | 56 |          |
| SMR000450983          |    | CDD-308570 | 56 |          |
| Fludarabine phosphate |    | CDD-864    | 56 |          |
| JHU- 12275            |    | CDD-47321  | 56 |          |
| SMR000058796          |    | CDD-327201 | 55 |          |
| SMR000058796          |   | CDD-327201 | 55 |          |
| 213648                |  | CDD-50448  | 55 | 100      |
| TBL-1747              |  | CDD-341006 | 55 |          |
| SMR000326869          |  |            | 55 |          |
| SMR000326869          |  | CDD-215785 | 55 |          |

**ESSENTIAL MOLECULE: MESO-DIAMINOPIMELATE**

|                      |                                                                                     |            |     |            |
|----------------------|-------------------------------------------------------------------------------------|------------|-----|------------|
| meso-diaminopimelate | 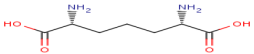   | CDD-47339  | 100 |            |
| JHU-5918             |    | CDD-47339  | 98  |            |
| 692_FDAMDD_v3b       |    | CDD-47990  | 98  |            |
| SMR000102743         |    | CDD-258204 | 90  | -7.02      |
| SMR000387093         |    | CDD-170625 | 81  | -15.48     |
| SN-5889              |    | CDD-5133   | 81  |            |
| SMR000102742         |    | CDD-161620 | 80  | -9.8       |
| 6-aminohexanoic acid |  | CDD-7      | 77  |            |
| L-glutamate          |  | CDD-41783  | 69  |            |
| SMR000033946         |  | CDD-41783  | 69  | 0          |
| SMR000278375         |  | CDD-222679 | 68  | 3.53, 4.04 |

|                          |                                                                                     |            |    |        |                         |          |
|--------------------------|-------------------------------------------------------------------------------------|------------|----|--------|-------------------------|----------|
| SMR000338326             | 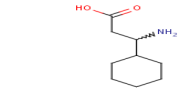   | CDD-171480 | 67 | 1.31   |                         |          |
| Glutamate-1-semialdehyde |    |            | 66 |        |                         |          |
| SMR000299536             |    | CDD-221626 | 65 | 0.31   |                         |          |
| Tranexamic acid          |    | CDD-689    | 65 |        |                         |          |
| Tranexamic acid          |    | CDD-689    | 65 | -33    |                         |          |
| TBL-734                  |    | CDD-340419 | 65 |        |                         |          |
| TBL-734                  |    | CDD-340419 | 65 |        | Inhibition of I Invitro | 12538025 |
| SMR000112203             |    | CDD-46795  | 62 | 7.39   |                         |          |
| SMR000059164             |    | CDD-61     | 62 | -11.58 |                         |          |
| TBL-1707                 |  | CDD-2534   | 62 |        | Antimycobac Invitro     | 16180806 |
| TBL-1710                 |  | CDD-340981 | 62 |        | Antimycobac Invitro     | 16180806 |
| TBL-2523                 |  | CDD-341652 | 62 |        | Inhibition of I Invitro | 18054225 |
| Gabapentin               |  | CDD-297    | 62 | 10     |                         |          |

|                    |                                                                                     |            |    |         |        |
|--------------------|-------------------------------------------------------------------------------------|------------|----|---------|--------|
| SMR000058664       |    | CDD-160221 | 59 |         | -0.52  |
| SMR000326773       |    | CDD-254061 | 59 |         | -11.86 |
| SMR000131763       |    | CDD-161284 | 58 |         | 1.27   |
| SMR000386957       |    | CDD-42709  | 58 |         | 9.95   |
| Vigabatrin         |    | CDD-1052   | 58 | 0       |        |
| SMR000315130       |    | CDD-60021  | 57 |         | 2.4    |
| 17609              |    | CDD-53758  | 57 | 16.8387 |        |
| SMR000127417       |    | CDD-255913 | 57 |         | 6.65   |
| SMR000036610       |   | CDD-154969 | 55 |         | -7.64  |
| SMR000416006       |  | CDD-192760 | 55 |         | -0.4   |
| SMR000175091       |  | CDD-271453 | 55 |         | 6.47   |
| SMR000175090       |  | CDD-304261 | 55 |         | 3.77   |
| 5-amino-levulinate |  | CDD-15328  | 55 |         |        |

|              |                                                                                     |            |    |         |                         |          |
|--------------|-------------------------------------------------------------------------------------|------------|----|---------|-------------------------|----------|
| 17610        | 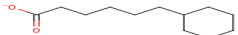   | CDD-54322  | 54 | 31.4245 |                         |          |
| TBL-1709     |    | CDD-340980 | 54 |         | Antimycobac Invitro     | 16180806 |
| TBL-2524     |    | CDD-341653 | 53 |         | Inhibition of I Invitro | 18054225 |
| SMR000424877 |    | CDD-285242 | 53 |         | -3.95                   |          |
| SMR000471834 |    | CDD-309946 | 52 |         | -4.9                    |          |
| 92585        |    | CDD-53528  | 52 | 13.5934 |                         |          |
| 17612        |    | CDD-53378  | 52 | 11.6665 |                         |          |
| SMR000113247 |    | CDD-322745 | 52 |         | -5.43                   |          |
| SMR000019012 |    | CDD-338808 | 52 |         | -15.89                  |          |
| SMR000058285 |  | CDD-14017  | 51 |         | -5.23                   |          |
| SMR000499581 |  | CDD-717    | 51 | 14.81   |                         |          |
| 17614        |  | CDD-54032  | 51 | 22.2056 |                         |          |



## ESSENTIAL MOLECULE: D-alanine-D-alanine

|                               |                                                                                     |            |    |       |
|-------------------------------|-------------------------------------------------------------------------------------|------------|----|-------|
| CDD-62785                     | 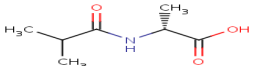   | CDD-62785  | 82 |       |
| CDD-74989                     |    | CDD-74989  | 82 |       |
| CDD-63657                     |    | CDD-63657  | 75 |       |
| CDD-62786                     |    | CDD-62786  | 74 |       |
| CDD-63766                     |    | CDD-63766  | 71 |       |
| CDD-57283                     |    | CDD-57283  | 66 |       |
| SMR000039488                  |    | CDD-234078 | 65 | 0.62  |
| SMR000365399                  |   | CDD-61098  | 63 | 0.28  |
| 7561067                       |  | CDD-145987 | 62 | 2.56  |
| Aspartic acid, N-acetyl (R,S) |  | CDD-1369   | 61 | 1     |
| SMR000135311                  |  | CDD-258631 | 60 | 0.34  |
| SMR000298068                  |  | CDD-240528 | 60 | -6.98 |

|              |                                                                                     |            |    |         |
|--------------|-------------------------------------------------------------------------------------|------------|----|---------|
| SMR000132432 | 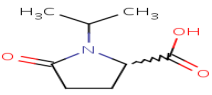   | CDD-168599 | 59 | 2.15    |
| SMR000132615 |    | CDD-326812 | 58 | 1.77    |
| SMR000368756 |    | CDD-59139  | 57 | -6.48   |
| SMR000324857 |    | CDD-158233 | 57 | -6.28   |
| SMR000275346 |    | CDD-253586 | 57 | 4.02    |
| 7823679      |    | CDD-131606 | 57 | -1.12   |
| SMR000326657 |    | CDD-327150 | 57 | -8.05   |
| SMR000145624 |    | CDD-161166 | 56 | -1.99   |
| SMR000033650 |   | CDD-165697 | 56 | -0.61   |
| SMR000393684 |  | CDD-197851 | 56 | -3.18   |
| 18685        |  | CDD-54256  | 56 | 28.7725 |
| SMR000231097 |  | CDD-150148 | 55 | -0.65   |
| SMR000023915 |  | CDD-204064 | 55 | -8.53   |

|              |                                                                                     |            |    |         |                     |
|--------------|-------------------------------------------------------------------------------------|------------|----|---------|---------------------|
| SMR000064358 | 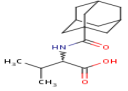   | CDD-159991 | 54 |         | -7.6                |
| SMR000038218 |    | CDD-335296 | 54 |         | -3.17               |
| SMR000281812 |    | CDD-265293 | 54 |         | -7.97               |
| 5219863      |    | CDD-130340 | 54 |         | -11.35              |
| 1653         |    | CDD-51090  | 53 | 0.00816 |                     |
| SMR000389080 |    | CDD-169480 | 53 |         | -3.82               |
| SMR000124115 |    | CDD-58256  | 53 |         | 5.98                |
| SMR000062190 |    | CDD-159948 | 53 |         | -3.59               |
| Captopril    |   | CDD-1069   | 53 | 10      |                     |
| SMR000059061 |  | CDD-1069   | 53 |         | -12.15              |
| TBL-6682     |  | CDD-344159 | 53 |         | Antimycobac Invitro |
| SMR000151266 |  | CDD-57914  | 53 |         | 1.52                |
| SMR000059905 |  | CDD-287960 | 53 |         | 4.72                |

|              |                                                                                     |            |    |              |
|--------------|-------------------------------------------------------------------------------------|------------|----|--------------|
| SMR000253920 | 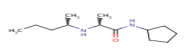   | CDD-316141 | 52 | -6.8         |
| 7668592      |    | CDD-129640 | 52 | 0.53         |
| SMR000285755 |    | CDD-163261 | 52 | -12.36, -8.9 |
| SMR000065739 |    | CDD-339642 | 52 | -12.06       |
| SMR000025113 |    | CDD-225760 | 51 | 6.19         |
| SMR000275429 |    | CDD-58257  | 51 | 8.98         |
| SMR000022542 |    | CDD-184338 | 51 | 1.14         |
| SMR000038578 |    | CDD-261447 | 51 | -10.28       |
| SMR000462344 |   | CDD-266148 | 51 | -2.35        |
| SMR000010934 |  | CDD-302106 | 50 | -2           |
| SMR000130285 |  | CDD-231616 | 50 | -2.41        |
| 7890140      |  | CDD-131621 | 50 | -1.5         |

**ESSENTIAL MOLECULE: Shikimate-3-phosphate**

|                                     |                                                                                     |            |     |       |
|-------------------------------------|-------------------------------------------------------------------------------------|------------|-----|-------|
| Shikimate-3-phosphate               | 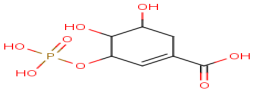   |            | 100 |       |
| 5-enolpyruvyl-shikimate-3-phosphate |    |            | 80  |       |
| Shikimate                           |    |            | 67  |       |
| 3-dehydro-shikimate                 |    |            | 57  |       |
| 3-deoxy-d-arabino-heptulose         |    |            | 54  |       |
| CDD-14819                           |    | CDD-14819  | 51  |       |
| SMR000440586                        |    | CDD-163046 | 51  | 8.8   |
| SMR000265086                        |   | CDD-291571 | 50  | -8.06 |
| CDD-46044                           |  | CDD-46044  | 50  |       |
| TBL-3891                            |  | CDD-342011 | 49  |       |
| SMR000156259                        |  | CDD-186881 | 49  | -3.61 |
| CDD-870                             |  | CDD-870    | 48  |       |

|              |                                                                                     |            |    |        |
|--------------|-------------------------------------------------------------------------------------|------------|----|--------|
| SMR000453594 | 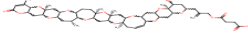   | CDD-168394 | 48 | -9.09  |
| TBL-1582     |    | CDD-340890 | 48 |        |
| SMR000440625 |    | CDD-168409 | 47 | 48.57  |
| SMR000440592 |    | CDD-169155 | 47 | 1.25   |
| TBL-1585     |    | CDD-340893 | 47 |        |
| SMR000265087 |    | CDD-169952 | 47 | 6.08   |
| SMR000265081 |    | CDD-170928 | 47 | 7.64   |
| SMR000445667 |    | CDD-270524 | 47 | -10.55 |
| SMR000445666 |   | CDD-337904 | 47 | -4.72  |
| 342055       |  | CDD-53251  | 47 | 10.16  |
| TBL-1708     |  | CDD-340979 | 47 |        |
| SMR000453593 |  | CDD-327066 | 46 | -1.93  |
| TBL-1587     |  | CDD-340895 | 46 |        |

|                          |                                                                                     |            |    |         |        |
|--------------------------|-------------------------------------------------------------------------------------|------------|----|---------|--------|
| SMR000471888             | 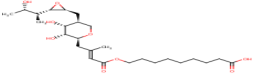   | CDD-164785 | 46 |         | -9.93  |
| TBL-3894                 |    | CDD-342566 | 46 |         |        |
| TBL-1586                 |    | CDD-340894 | 46 |         |        |
| 132                      |    | CDD-52622  | 46 | 3.87814 |        |
| SMR000059232             |    | CDD-152203 | 46 |         | 25.01  |
| TBL-1244                 |    | CDD-340732 | 45 |         |        |
| TBL-1245                 |    | CDD-340733 | 45 |         |        |
| Fusidic acid sodium salt |    | CDD-1346   | 45 | 72      |        |
| SMR000058813             |   | CDD-160129 | 45 |         | 11.43  |
| SMR000265080             |  | CDD-163028 | 45 |         | 15.04  |
| SMR000156260             |  | CDD-339894 | 45 |         | -10.64 |
| TBL-1594                 |  | CDD-340902 | 45 |         |        |
| TBL-1248                 |  | CDD-340736 | 45 |         |        |

|              |                                                                                     |            |    |       |
|--------------|-------------------------------------------------------------------------------------|------------|----|-------|
| TBL-3893     | 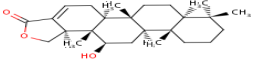   | CDD-342392 | 45 |       |
| TBL-1247     |    | CDD-340735 | 44 |       |
| SMR000232280 |    | CDD-169346 | 44 | -1.64 |
| SMR000058916 |    | CDD-168620 | 44 | -2.26 |
| TBL-1590     |    | CDD-340898 | 44 |       |
| TBL-1589     |    | CDD-340897 | 44 |       |
| TBL-1596     |    | CDD-340904 | 44 |       |
| TBL-1588     |    | CDD-340896 | 44 |       |
| TBL-1706     |    | CDD-340978 | 43 |       |
| SMR000545216 |  | CDD-200281 | 43 | 1.22  |
| SMR000226339 |  | CDD-161966 | 43 | 1.15  |
| TBL-1583     |  | CDD-340891 | 43 |       |



**ESSENTIAL MOLECULE: 5-enolpyruvyl-shikimate-3-phosphate**

|                              |                                                                                                |  |     |        |
|------------------------------|------------------------------------------------------------------------------------------------|--|-----|--------|
| 5-enolpyruvyl-shikimate-3-pl | 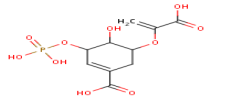              |  | 100 |        |
| Shikimate-3-phosphate        |               |  | 80  |        |
| SMR000156259                 |  CDD-186881   |  | 58  | -3.61  |
| SMR000265086                 |  CDD-291571   |  | 58  | -8.06  |
| SMR000440625                 |  CDD-168409   |  | 56  | 48.57  |
| SMR000440592                 |  CDD-169155   |  | 56  | 1.25   |
| SMR000453594                 |  CDD-168394   |  | 56  | -9.09  |
| SMR000445667                 |  CDD-270524  |  | 55  | -10.55 |
| Chorismate                   |             |  | 55  |        |
| SMR000445666                 |  CDD-337904 |  | 55  | -4.72  |
| SMR000440586                 |  CDD-163046 |  | 55  | 8.8    |
| SMR000265087                 |  CDD-169952 |  | 55  | 6.08   |

|              |                                                                                     |            |    |         |                                               |
|--------------|-------------------------------------------------------------------------------------|------------|----|---------|-----------------------------------------------|
| SMR000265081 | 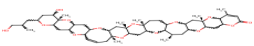   | CDD-170928 | 55 | 7.64    |                                               |
| SMR000156260 |    | CDD-339894 | 54 | -10.64  |                                               |
| SMR000453593 |    | CDD-327066 | 54 | -1.93   |                                               |
| SMR000471888 |    | CDD-164785 | 54 | -9.93   |                                               |
| Shikimate    |    |            | 54 |         |                                               |
| SMR000265080 |    | CDD-163028 | 53 | 15.04   |                                               |
| SMR000471880 |    | CDD-216139 | 53 | -10.88  |                                               |
| SMR000265084 |    | CDD-168393 | 52 | 83.59   |                                               |
| 166619       |   | CDD-53115  | 52 | 8.50625 |                                               |
| TBL-745      |  | CDD-340430 | 52 |         | Antimycobac Invitro, Invit 12657257, 12657258 |
| TBL-1706     |  | CDD-340978 | 51 |         | Antimycobac Invitro 16180806                  |
| TBL-3891     |  | CDD-342011 | 51 |         | Antimycobac Invitro 16378375                  |
| 342055       |  | CDD-53251  | 50 | 10.16   |                                               |

|                                       |                                                                                     |            |     |    |                     |          |
|---------------------------------------|-------------------------------------------------------------------------------------|------------|-----|----|---------------------|----------|
| TBL-1708                              | 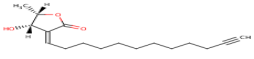   | CDD-340979 | 50  |    | Antimycobac Invitro | 16180806 |
| Ivermectin                            |    | CDD-1173   | 50  | 95 |                     |          |
| SMR000440631                          |    | CDD-170291 | 50  |    |                     | -10.11   |
| <b>ESSENTIAL MOLECULE: Chorismate</b> |                                                                                     |            |     |    |                     |          |
| Chorismate                            |    |            | 100 |    |                     |          |
| SMR000440586                          |    | CDD-163046 | 58  |    |                     |          |
| 5-enolpyruvyl-shikimate-3-phosphate   |    |            | 55  |    |                     |          |
| Ascorbic acid                         |   | CDD-1295   | 52  | -6 |                     |          |
| TBL-1704                              |  | CDD-340976 | 51  |    |                     |          |
| TBL-1244                              |  | CDD-340732 | 50  |    |                     |          |
| TBL-1245                              |  | CDD-340733 | 50  |    |                     |          |
| 342055                                |  | CDD-53251  | 50  |    |                     | 10.16    |

|              |                                                                                     |            |    |
|--------------|-------------------------------------------------------------------------------------|------------|----|
| TBL-1708     | 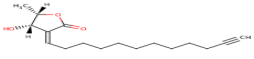   | CDD-340979 | 50 |
| SMR000156259 |    | CDD-186881 | 50 |
| SMR000265086 |    | CDD-291571 | 49 |
| SMR000265087 |    | CDD-169952 | 49 |
| SMR000265081 |    | CDD-170928 | 49 |
| SMR000440592 |    | CDD-169155 | 48 |
| SMR000453593 |    | CDD-327066 | 48 |
| SMR000453594 |    | CDD-168394 | 48 |
| SMR000265080 |   | CDD-163028 | 48 |
| SMR000460905 |  | CDD-263155 | 48 |
| SMR000456927 |  | CDD-257348 | 47 |
| SMR000471888 |  | CDD-164785 | 47 |
| SMR000440625 |  | CDD-168409 | 47 |

|              |                                                                                     |            |    |                   |
|--------------|-------------------------------------------------------------------------------------|------------|----|-------------------|
| SMR000232308 | 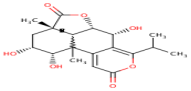   | CDD-168813 | 46 |                   |
| SMR000232307 |    | CDD-186948 | 46 |                   |
| SMR000471880 |    | CDD-216139 | 46 |                   |
| SMR000156260 |    | CDD-339894 | 45 |                   |
| 167369       |    | CDD-52019  | 45 | 0.983213, 2.30279 |
| Shikimate    |    |            | 45 |                   |
| SMR000445667 |    | CDD-270524 | 45 |                   |
| 10666        |    | CDD-48179  | 44 | 38.058            |
| 10666        |   | CDD-48179  | 44 | 38.0573           |
| TBL-3891     |  | CDD-342011 | 44 |                   |
| SMR000147083 |  | CDD-338334 | 44 |                   |
| TBL-1249     |  | CDD-340737 | 44 |                   |
| 419060       |  | CDD-50320  | 43 | 73.008            |

|              |                                                                                     |            |    |         |
|--------------|-------------------------------------------------------------------------------------|------------|----|---------|
| TBL-6663     | 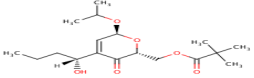   | CDD-344460 | 43 |         |
| SMR000037070 |    | CDD-207739 | 43 |         |
| 17922        |    | CDD-48991  | 43 | 14.651  |
| TBL-5660     |    | CDD-344465 | 43 |         |
| TBL-5660     |    | CDD-344465 | 43 |         |
| SMR000440588 |    | CDD-325620 | 43 |         |
| SMR000031519 |    | CDD-44177  | 43 |         |
| 166619       |    | CDD-53115  | 43 | 8.50625 |
| TBL-745      |   | CDD-340430 | 43 |         |
| Ivermectin   |  | CDD-1173   | 43 | 95      |
| SMR000440685 |  | CDD-254770 | 43 |         |
| SMR000445666 |  | CDD-337904 | 43 |         |
| SMR000020726 |  | CDD-165542 | 43 |         |

|              |                                                                                   |            |    |         |
|--------------|-----------------------------------------------------------------------------------|------------|----|---------|
| 132          |  | CDD-52622  | 43 | 3.87814 |
| SMR000059232 |  | CDD-152203 | 43 |         |
| SMR000265084 |  | CDD-168393 | 43 |         |

### ESSENTIAL MOLECULE: UDP-N-acetylmuramoyl-L-alanyl-D-glutamyl-meso-2,6-diaminopimelyl-D-alanyl-D-alanine

|                            |                                                                                     |            |     |                       |
|----------------------------|-------------------------------------------------------------------------------------|------------|-----|-----------------------|
| UDP-N-acetylmuramoyl-L-al  | 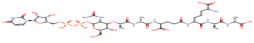   |            | 100 |                       |
| UDP-N-acetyl-muramate      |    |            | 91  |                       |
| UDP-GlcNAc-enol pyruvate   |    |            | 89  |                       |
| UDP-N-acetyl-D-glucosamine |    |            | 88  |                       |
| JHU- 12039                 |  | CDD-42391  | 68  |                       |
| JHU- 2276                  |  | CDD-128568 | 67  |                       |
| TBL-7912                   |  |            | 64  |                       |
| TBL-7912                   |  | CDD-343091 | 64  | Binding affir Invitro |

|                         |                                                                                     |            |    |       |
|-------------------------|-------------------------------------------------------------------------------------|------------|----|-------|
| Cyanocobalamin          | 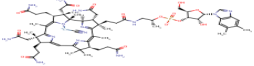   | CDD-1384   | 63 |       |
| Cyanocobalamin          |    | CDD-1384   | 63 | 33    |
| JHU- 2633               |    | CDD-45948  | 63 |       |
| JHU- 5184               |    | CDD-45951  | 63 |       |
| Hydroxocobalamin        |    | CDD-891    | 63 |       |
| JHU- 2457               |    | CDD-46421  | 63 |       |
| JHU- 4913               |    | CDD-47349  | 63 |       |
| JHU- 10786              |    | CDD-45950  | 63 |       |
| JHU- 1441               |    | CDD-128664 | 61 |       |
| Bucladesine sodium salt |   | CDD-1701   | 60 |       |
| Bucladesine sodium salt |  | CDD-1701   | 60 | -1    |
| SMR000058940            |  |            | 60 |       |
| SMR000058940            |  | CDD-303017 | 60 | -9.01 |



|          |                                                                                     |            |    |    |                              |
|----------|-------------------------------------------------------------------------------------|------------|----|----|------------------------------|
| Nadide   | 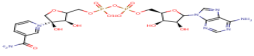   | CDD-1644   | 59 |    |                              |
| Nadide   |    | CDD-1644   | 59 | -3 |                              |
| ST013879 |    | CDD-45534  | 59 |    |                              |
| 71645    |    | CDD-51970  | 59 |    | 0.774865                     |
| TBL-2459 |    | CDD-341600 | 58 |    | Antimycoba Invitro, Invitro, |
| 337554   |    | CDD-51939  | 58 |    | 0.67926                      |
| 337555   |    | CDD-51946  | 58 |    | 0.68766                      |
| 337553   |    | CDD-52135  | 58 |    | 1.34213                      |
| TBL-6222 |   | CDD-343099 | 58 |    | Antimycoba Invitro, Invitro  |
| TBL-6224 |  | CDD-343101 | 58 |    | Antimycoba Invitro, Invitro  |
| TBL-8595 |  | CDD-343074 | 58 |    |                              |
| TBL-8595 |  | CDD-343074 | 58 |    | Inhibition of Invitro        |
| 195926   |  | CDD-48298  | 58 |    | 0.46                         |

|              |                                                                                   |            |    |         |                             |
|--------------|-----------------------------------------------------------------------------------|------------|----|---------|-----------------------------|
| TBL-2165     | 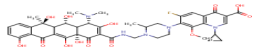 | CDD-341359 | 58 |         | Antimycoba Invitro          |
| 181984       |  | CDD-52136  | 58 | 1.34213 |                             |
| 337556       |  | CDD-52150  | 58 | 1.37532 |                             |
| TBL-6223     |  | CDD-343100 | 58 |         | Antimycoba Invitro, Invitro |
| 228906       |  | CDD-48239  | 58 | 0.237   |                             |
| TBL-2158     |  | CDD-341352 | 58 |         | Antimycoba Invitro          |
| SMR000326870 |  | CDD-298228 | 58 |         |                             |
| SMR000326870 |  | CDD-298228 | 58 |         | -6.79                       |
| 117174       |  | CDD-48351  | 58 | 0.985   |                             |
| TBL-2162     |  | CDD-341356 | 58 |         | Antimycoba Invitro          |
| SMR000058761 |  | CDD-165952 | 58 |         | 17.86, 15.31                |
| 586074       |  | CDD-48242  | 58 | 0.24    |                             |
| TBL-2161     |  | CDD-341355 | 58 |         | Antimycoba Invitro          |

|                            |                                                                                   |           |    |    |       |
|----------------------------|-----------------------------------------------------------------------------------|-----------|----|----|-------|
| Dihydroergotamine tartrate | 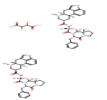 | CDD-1167  | 58 | 17 |       |
| JHU- 6717                  |  | CDD-47258 | 58 |    |       |
| S87482                     |  | CDD-48352 | 58 |    | 0.989 |

### ESSENTIAL MOLECULE: Porphobilinogen

|                     |                                                                                     |            |     |       |  |
|---------------------|-------------------------------------------------------------------------------------|------------|-----|-------|--|
| Porphobilinogen     | 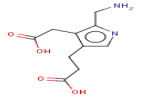   |            | 100 |       |  |
| Hydroxymethylbilane |    |            | 66  |       |  |
| SMR000117351        |    | CDD-208163 | 55  | -5.91 |  |
| SMR000123140        |   | CDD-55430  | 55  | -2.28 |  |
| 5211865             |  | CDD-138969 | 54  | 9.74  |  |
| SMR000024024        |  | CDD-149482 | 54  | -3.92 |  |
| SMR000459807        |  | CDD-152742 | 52  | 5.35  |  |
| SMR000037041        |  | CDD-334358 | 52  | 5.97  |  |

|              |  |            |    |        |
|--------------|--|------------|----|--------|
| SMR000278254 |  | CDD-216976 | 51 | -0.71  |
| SMR000025645 |  | CDD-231080 | 51 | -3     |
| SMR000036607 |  | CDD-337101 | 51 | 0.17   |
| SMR000155142 |  | CDD-183928 | 51 | -3.19  |
| SMR000336071 |  | CDD-282511 | 51 | 0.64   |
| SMR000335595 |  | CDD-241050 | 51 | -3.62  |
| 5986957      |  | CDD-130567 | 51 | -4.65  |
| SMR000335954 |  | CDD-156346 | 51 | -10.08 |
| SMR000153824 |  | CDD-194562 | 50 | -6.76  |
| SMR000026827 |  | CDD-179263 | 50 | -10.38 |
| SMR000278070 |  | CDD-186584 | 50 | 10.91  |
| CDD-117099   |  | CDD-117099 | 50 |        |
| SMR000335875 |  | CDD-240393 | 50 | 3.35   |

|              |                                                                                     |            |    |        |
|--------------|-------------------------------------------------------------------------------------|------------|----|--------|
| SMR000026822 | 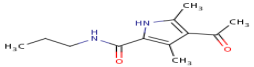   | CDD-179193 | 50 | -14.03 |
| SMR000456742 |    | CDD-256082 | 50 | 3.69   |
| 7823323      |    | CDD-58764  | 50 | 0.5    |
| SMR000335871 |    | CDD-331448 | 49 | -1.86  |
| SMR000375722 |    | CDD-294239 | 49 | 5.54   |
| 7587340      |    | CDD-129634 | 49 | 1.98   |
| CDD-148185   |    | CDD-148185 | 49 |        |
| SMR000335921 |    | CDD-148185 | 49 | 2.24   |
| SMR000309262 |   | CDD-149384 | 49 | -1.66  |
| SMR000336065 |  | CDD-281580 | 49 | -6.09  |
| SMR000094066 |  | CDD-230624 | 49 | -1.59  |
| SMR000130725 |  | CDD-150735 | 49 | -4.14  |
| SMR000026815 |  | CDD-179261 | 49 | -4.86  |

|              |                                                                                     |            |    |       |
|--------------|-------------------------------------------------------------------------------------|------------|----|-------|
| SMR000335872 | 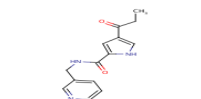   | CDD-158685 | 49 | 4.38  |
| SMR000335950 |    | CDD-331972 | 49 | -1.89 |
| SMR000243841 |    | CDD-292749 | 49 | 3.93  |
| SMR000153247 |    | CDD-159312 | 48 | -2.14 |
| SMR000352704 |    | CDD-241355 | 48 | -0.41 |
| SMR000107043 |    | CDD-257352 | 48 | -0.81 |
| SMR000179978 |    | CDD-210689 | 48 | 4.33  |
| SMR000343464 |    | CDD-281709 | 48 | -0.06 |
| SMR000336142 |   | CDD-305702 | 48 | 2.26  |
| SMR000179924 |  | CDD-255030 | 48 | 15.83 |
| SMR000027355 |  | CDD-288736 | 48 | -16.3 |
| SMR000242789 |  | CDD-215687 | 48 | 0.38  |
| SMR000130680 |  | CDD-207723 | 48 | 2.4   |

|              |                                                                                   |            |    |       |
|--------------|-----------------------------------------------------------------------------------|------------|----|-------|
| SMR000066691 | 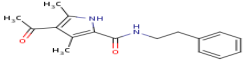 | CDD-225576 | 48 | -0.84 |
| SMR000242790 |  | CDD-272930 | 48 | 3.64  |
| SMR000335874 |  | CDD-194417 | 48 | 5.43  |

### ESSENTIAL MOLECULE: Hydroxymethylbilane

|                     |                                                                                     |            |     |  |
|---------------------|-------------------------------------------------------------------------------------|------------|-----|--|
| Hydroxymethylbilane | 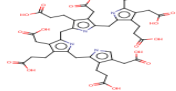   |            | 100 |  |
| SMR000107043        |    | CDD-257352 | 73  |  |
| Porphobilinogen     |    |            | 66  |  |
| SMR000024024        |   | CDD-149482 | 58  |  |
| SMR000117351        |  | CDD-208163 | 58  |  |
| SMR000123140        |  | CDD-55430  | 58  |  |
| SMR000459808        |  | CDD-198465 | 57  |  |
| 5211865             |  | CDD-138969 | 57  |  |

|                       |                                                                                     |            |    |     |
|-----------------------|-------------------------------------------------------------------------------------|------------|----|-----|
| SMR000459807          | 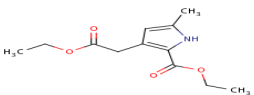   | CDD-152742 | 57 |     |
| 5986957               |    | CDD-130567 | 57 |     |
| SMR000037041          |    | CDD-334358 | 56 |     |
| SMR000025512          |    | CDD-210467 | 55 |     |
| SMR000024321          |    | CDD-339602 | 55 |     |
| SMR000093505          |    | CDD-154640 | 54 |     |
| SMR000025514          |    | CDD-209686 | 54 |     |
| SMR000093494          |    | CDD-182122 | 54 |     |
| 7906781               |   | CDD-136039 | 54 |     |
| SMR000025506          |  | CDD-166484 | 54 |     |
| SMR000025513          |  | CDD-209635 | 54 |     |
| Zomepirac sodium salt |  | CDD-1673   | 53 | -35 |
| 7906780               |  | CDD-136031 | 53 |     |



|              |                                                                                     |            |    |
|--------------|-------------------------------------------------------------------------------------|------------|----|
| 7587340      | 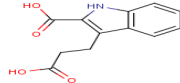   | CDD-129634 | 53 |
| SMR000081378 |    | CDD-303193 | 53 |
| SMR000025515 |    | CDD-209746 | 52 |
| SMR000093486 |    | CDD-212908 | 52 |
| SMR000093466 |    | CDD-339231 | 52 |
| SMR000093495 |    | CDD-182140 | 52 |
| SMR000306976 |    | CDD-148558 | 52 |
| SMR000093501 |    | CDD-257704 | 52 |
| SMR000093496 |    | CDD-182155 | 52 |
| SMR000136914 |  | CDD-152896 | 52 |
| SMR000093493 |  | CDD-153474 | 52 |
| SMR000092996 |  | CDD-160023 | 52 |
| SMR000307292 |  | CDD-296215 | 52 |

|              |                                                                                     |            |    |
|--------------|-------------------------------------------------------------------------------------|------------|----|
| 7906779      | 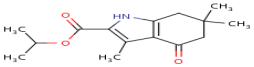   | CDD-136030 | 52 |
| SMR000096120 |    | CDD-181455 | 52 |
| SMR000093499 |    | CDD-166337 | 51 |
| SMR000136941 |    | CDD-179490 | 51 |
| SMR000025570 |    | CDD-286570 | 51 |
| SMR000093490 |    | CDD-338081 | 51 |
| 6954555      |    | CDD-134916 | 51 |
| SMR000093015 |    | CDD-174968 | 51 |
| SMR000274100 |   | CDD-293633 | 51 |
| 7744779      |  | CDD-131846 | 50 |
| SMR000025504 |  | CDD-286801 | 50 |
| SMR000093500 |  | CDD-270619 | 50 |
| SMR000102649 |  | CDD-212741 | 50 |

|                                             |                                                                                     |            |     |         |
|---------------------------------------------|-------------------------------------------------------------------------------------|------------|-----|---------|
| SMR000102569                                | 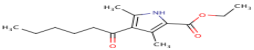   | CDD-328715 | 50  |         |
| SMR000093492                                |    | CDD-182049 | 50  |         |
| SMR000093504                                |    | CDD-270948 | 50  |         |
| <b>ESSENTIAL MOLECULE: 3-dehydroquinate</b> |                                                                                     |            |     |         |
| 3-dehydroquinate                            |    |            | 100 |         |
| JHU- 1639                                   |    | CDD-45916  | 83  |         |
| ST069282                                    |    | CDD-45776  | 83  |         |
| 110597                                      |   | CDD-53000  | 70  | 7.05746 |
| 110596                                      |  | CDD-53864  | 70  | 18.5625 |
| 110595                                      |  | CDD-54402  | 70  | 37.1249 |
| JHU- 12273                                  |  | CDD-2617   | 69  |         |
| anhydrous citric acid                       |  | CDD-48     | 68  |         |

SMR000471840

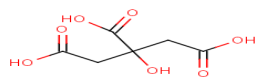

CDD-48

68

JHU- 9224

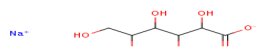

CDD-46125

68

SMR000528036

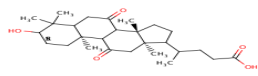

CDD-150659

66

SMR000393714

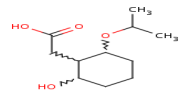

CDD-197336

64

SMR000039502

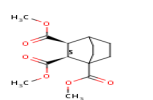

CDD-147934

62

SMR000019361

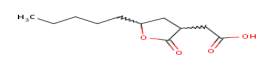

CDD-229928

60

SMR000104203

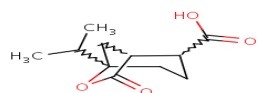

CDD-257145

60

SMR000123336

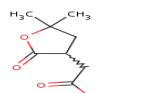

CDD-166825

59

5238109

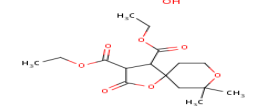

CDD-130298

59

SMR000111707

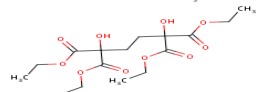

CDD-229008

59

SMR000137265

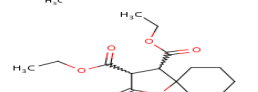

CDD-161355

58

SMR000058587

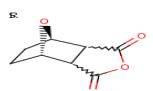

CDD-270132

58

SMR000445654

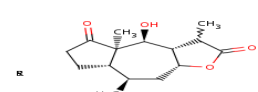

CDD-170204

58

|              |                                                                                     |            |    |         |
|--------------|-------------------------------------------------------------------------------------|------------|----|---------|
| SMR000445680 | 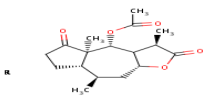   | CDD-270520 | 57 |         |
| TBL-1584     |    | CDD-340892 | 57 |         |
| SMR000123994 |    | CDD-166641 | 57 |         |
| SMR000069228 |    | CDD-258722 | 57 |         |
| SMR000104230 |    | CDD-260656 | 56 |         |
| 110164       |    | CDD-52283  | 56 | 2.07205 |
| SMR000445659 |    | CDD-254695 | 56 |         |
| SMR000034660 |    | CDD-301107 | 55 |         |
| SMR000009949 |   | CDD-285479 | 55 |         |
| SMR000019471 |  | CDD-289161 | 55 |         |
| Chenodiol    |  | CDD-1265   | 55 | -5      |
| SMR000112166 |  | CDD-147252 | 55 |         |
| SMR000112165 |  | CDD-799    | 55 |         |

|                 |                                                                                     |            |    |         |
|-----------------|-------------------------------------------------------------------------------------|------------|----|---------|
| SMR000058403    | 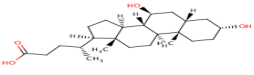   | CDD-714    | 55 |         |
| 110165          |    | CDD-52626  | 55 | 3.91644 |
| 17699           |    | CDD-53608  | 55 | 14.7    |
| SMR000074082    |    | CDD-205425 | 55 |         |
| SMR000054222    |    | CDD-264022 | 55 |         |
| SMR000107058    |    | CDD-257426 | 54 |         |
| SMR000225910    |    | CDD-280341 | 54 |         |
| SMR000054383    |    | CDD-156070 | 54 |         |
| SMR000528042    |   | CDD-200173 | 54 |         |
| TBL-1582        |  | CDD-340890 | 54 |         |
| Androsterone    |  | CDD-1366   | 54 | -8      |
| SMR000058571    |  | CDD-1366   | 54 |         |
| Epiandrosterone |  | CDD-1390   | 54 | -4      |

|                             |                                                                                   |            |    |    |
|-----------------------------|-----------------------------------------------------------------------------------|------------|----|----|
| 3-alpha-hydroxy-5-beta-andr | 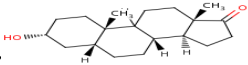 | CDD-1605   | 54 | -5 |
| Lithocholic acid            |  | CDD-1685   | 54 | 18 |
| SMR000238198                |  | CDD-339913 | 54 |    |

**ESSENTIAL MOLECULE: L-glutamate**

|                          |                                                                                     |            |     |       |
|--------------------------|-------------------------------------------------------------------------------------|------------|-----|-------|
| L-glutamate              | 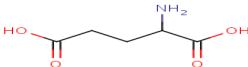   | CDD-41783  | 100 |       |
| SMR000033946             |    | CDD-41783  | 100 | 0     |
| Glutamate-1-semialdehyde |    |            | 93  |       |
| JHU-5918                 |   | CDD-47339  | 70  |       |
| 692_FDAMDD_v3b           |  | CDD-47990  | 70  |       |
| Vigabatrin               |  | CDD-1052   | 69  | 0     |
| meso-diaminopimelate     |  |            | 69  |       |
| SMR000102743             |  | CDD-258204 | 64  | -7.02 |

|                      |                                                                                     |            |    |         |
|----------------------|-------------------------------------------------------------------------------------|------------|----|---------|
| SMR000387093         | 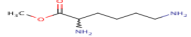   | CDD-170625 | 63 | -15.48  |
| SMR000299536         |    | CDD-221626 | 61 | 0.31    |
| SMR000058285         |    | CDD-14017  | 61 | -5.23   |
| SN-5889              |    | CDD-5133   | 60 |         |
| 6-aminohexanoic acid |    | CDD-7      | 60 |         |
| SMR000102742         |    | CDD-161620 | 58 | -9.8    |
| SMR000326773         |    | CDD-254061 | 57 | -11.86  |
| SMR000387065         |    | CDD-255763 | 55 | -8.88   |
| Gabapentin           |   | CDD-297    | 55 | 10      |
| SMR000413942         |  | CDD-297226 | 54 | -8.57   |
| 5-amino-levulinate   |  | CDD-15328  | 54 |         |
| SMR000131763         |  | CDD-161284 | 52 | 1.27    |
| 92585                |  | CDD-53528  | 52 | 13.5934 |



|                                               |                                                                                     |            |     |            |
|-----------------------------------------------|-------------------------------------------------------------------------------------|------------|-----|------------|
| SMR000471834                                  | 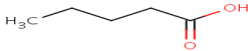   | CDD-309946 | 51  | -4.9       |
| SMR000278375                                  |    | CDD-222679 | 50  | 3.53, 4.04 |
| <b>ESSENTIAL MOLECULE: 5-amino-levulinate</b> |                                                                                     |            |     |            |
| 5-amino-levulinate                            |    | CDD-15328  | 100 |            |
| SMR000058997                                  |    | CDD-47114  | 85  | -6.59      |
| 6-aminohexanoic acid                          |    | CDD-7      | 63  |            |
| Glutamate-1-semialdehyde                      |    |            | 57  |            |
| SMR000102743                                  |    | CDD-258204 | 56  | -7.02      |
| JHU-5918                                      |  | CDD-47339  | 56  |            |
| 692_FDAMDD_v3b                                |  | CDD-47990  | 56  |            |
| SMR000386957                                  |  | CDD-42709  | 56  | 9.95       |
| meso-diaminopimelate                          |  |            | 55  |            |

|                           |                                                                                     |            |    |     |            |                              |
|---------------------------|-------------------------------------------------------------------------------------|------------|----|-----|------------|------------------------------|
| L-glutamate               | 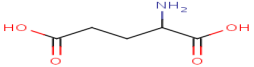   | CDD-41783  | 54 |     |            |                              |
| SMR000033946              |    | CDD-41783  | 54 |     | 0          |                              |
| SMR000471834              |    | CDD-309946 | 54 |     | -4.9       |                              |
| SMR000058285              |    | CDD-14017  | 52 |     | -5.23      |                              |
| Tranexamic acid           |    | CDD-689    | 51 |     |            |                              |
| Tranexamic acid           |    | CDD-689    | 51 | -33 |            |                              |
| SMR000102742              |    | CDD-161620 | 51 |     | -9.8       |                              |
| SMR000278375              |    | CDD-222679 | 49 |     | 3.53, 4.04 |                              |
| SMR000112203              |    | CDD-46795  | 49 |     | 7.39       |                              |
| SMR000059164              |  | CDD-61     | 49 |     | -11.58     |                              |
| TBL-1707                  |  | CDD-2534   | 49 |     |            | Antimycobac Invitro 16180806 |
| TBL-1710                  |  | CDD-340981 | 49 |     |            | Antimycobac Invitro 16180806 |
| Stachydrine hydrochloride |  | CDD-1538   | 48 | 6   |            |                              |

|              |                                                                                     |            |    |                         |          |
|--------------|-------------------------------------------------------------------------------------|------------|----|-------------------------|----------|
| 92585        | 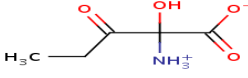   | CDD-53528  | 48 | 13.5934                 |          |
| SMR000036610 |    | CDD-154969 | 48 | -7.64                   |          |
| SMR000387093 |    | CDD-170625 | 48 | -15.48                  |          |
| SN-5889      |    | CDD-5133   | 48 |                         |          |
| Gabapentin   |    | CDD-297    | 48 | 10                      |          |
| Vigabatrin   |    | CDD-1052   | 47 | 0                       |          |
| SMR000326773 |    | CDD-254061 | 47 | -11.86                  |          |
| SMR000413942 |    | CDD-297226 | 47 | -8.57                   |          |
| SMR000326806 |   | CDD-15187  | 47 | -4.11                   |          |
| SMR000131763 |  | CDD-161284 | 46 | 1.27                    |          |
| SMR000499581 |  | CDD-717    | 46 | 14.81                   |          |
| TBL-734      |  | CDD-340419 | 45 |                         |          |
| TBL-734      |  | CDD-340419 | 45 | Inhibition of I Invitro | 12538025 |

|              |                                                                                     |            |    |         |       |                                  |
|--------------|-------------------------------------------------------------------------------------|------------|----|---------|-------|----------------------------------|
| 17609        | 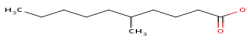   | CDD-53758  | 45 | 16.8387 |       |                                  |
| SMR000127417 |    | CDD-255913 | 45 |         | 6.65  |                                  |
| SMR000059031 |    | CDD-14310  | 45 |         | -9.78 |                                  |
| SMR000368338 |    | CDD-199400 | 44 |         | -17.3 |                                  |
| SMR000416006 |    | CDD-192760 | 44 |         | -0.4  |                                  |
| SMR000326864 |    | CDD-255416 | 44 |         | -8.82 |                                  |
| SMR000338326 |    | CDD-171480 | 44 |         | 1.31  |                                  |
| 17610        |    | CDD-54322  | 43 | 31.4245 |       |                                  |
| 95069        |   | CDD-54519  | 43 | 75.0801 |       |                                  |
| SMR000299536 |  | CDD-221626 | 43 |         | 0.31  |                                  |
| TBL-1709     |  | CDD-340980 | 43 |         |       | Antimycobac Invitro 16180806     |
| SMR000278049 |  | CDD-57028  | 43 |         | -6.16 |                                  |
| TBL-2523     |  | CDD-341652 | 42 |         |       | Inhibition of I Invitro 18054225 |

|                                                |                                                                                     |            |     |       |                                  |  |
|------------------------------------------------|-------------------------------------------------------------------------------------|------------|-----|-------|----------------------------------|--|
| SMR000315130                                   | 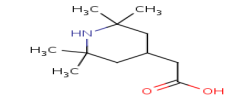   | CDD-60021  | 42  | 2.4   |                                  |  |
| SMR000058442                                   |    | CDD-847    | 42  | -8.4  |                                  |  |
| <b>ESSENTIAL MOLECULE: 3-dehydro-shikimate</b> |                                                                                     |            |     |       |                                  |  |
| 3-dehydro-shikimate                            |    |            | 100 |       |                                  |  |
| Shikimate                                      |    |            | 76  |       |                                  |  |
| SMR000440589                                   |    | CDD-289581 | 59  | -5.11 |                                  |  |
| Shikimate-3-phosphate                          |   |            | 57  |       |                                  |  |
| TBL-1582                                       |  | CDD-340890 | 57  |       | Inhibition of I Invitro 16033267 |  |
| SMR000058916                                   |  | CDD-168620 | 57  | -2.26 |                                  |  |
| SMR000440684                                   |  | CDD-170440 | 56  | 14.46 |                                  |  |
| SMR000232280                                   |  | CDD-169346 | 56  | -1.64 |                                  |  |

|                     |                                                                                     |            |    |         |                     |          |
|---------------------|-------------------------------------------------------------------------------------|------------|----|---------|---------------------|----------|
| SMR000058636        | 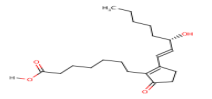   | CDD-289603 | 56 | -6.46   |                     |          |
| SMR000445663        |    | CDD-254713 | 54 | -7.5    |                     |          |
| SMR000440592        |    | CDD-169155 | 54 | 1.25    |                     |          |
| 342055              |    | CDD-53251  | 54 | 10.16   |                     |          |
| TBL-1708            |    | CDD-340979 | 54 |         | Antimycobac Invitro | 16180806 |
| SMR000440586        |    | CDD-163046 | 53 | 8.8     |                     |          |
| SMR000058692        |    | CDD-303018 | 53 | 15.5    |                     |          |
| SMR000058239        |    | CDD-45644  | 53 | 10.23   |                     |          |
| 398410              |   | CDD-52342  | 52 | 2.34365 |                     |          |
| 398407              |  | CDD-52727  | 52 | 4.6186  |                     |          |
| TBL-2624            |  | CDD-341738 | 52 |         | Antimycobac Invitro | 18471021 |
| SMR000440631        |  | CDD-170291 | 52 | -10.11  |                     |          |
| Hydrocortisone base |  | CDD-327    | 52 | -26     |                     |          |

|              |                                                                                     |            |    |                  |              |                              |
|--------------|-------------------------------------------------------------------------------------|------------|----|------------------|--------------|------------------------------|
| SMR000059022 | 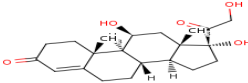   | CDD-327    | 52 |                  | -0.09        |                              |
| 213299       |    | CDD-53747  | 52 | 16.6899          |              |                              |
| 236245       |    | CDD-53789  | 52 | 17.3394          |              |                              |
| TBL-3894     |    | CDD-342566 | 52 |                  |              | Antimycobac Invitro 16378375 |
| SMR000445666 |    | CDD-337904 | 52 |                  | -4.72        |                              |
| SMR000445667 |    | CDD-270524 | 52 |                  | -10.55       |                              |
| 57093        |    | CDD-52554  | 51 | 3.48381          |              |                              |
| TBL-1735     |    | CDD-340999 | 51 |                  |              | Antimycobac Invitro 16309313 |
| SMR000445583 |    | CDD-164542 | 51 |                  | -1.26        |                              |
| SMR000528625 |   | CDD-255676 | 51 |                  | -6.63, -9.71 |                              |
| SMR000471888 |  | CDD-164785 | 51 |                  | -9.93        |                              |
| 181896       |  | CDD-52734  | 51 | 4.66526, 9.79704 |              |                              |
| 398411       |  | CDD-52783  | 51 | 5.15603          |              |                              |

|                               |                                                                                     |            |    |     |                                           |
|-------------------------------|-------------------------------------------------------------------------------------|------------|----|-----|-------------------------------------------|
| Canrenoic acid potassium salt | 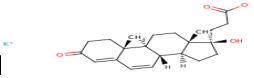   | CDD-1165   | 51 | -2  |                                           |
| SMR000058694                  |    | CDD-160272 | 51 |     | 21.67                                     |
| SMR000456667                  |    | CDD-197541 | 51 |     | 4.01                                      |
| 166619                        |    | CDD-53115  | 51 |     | 8.50625                                   |
| TBL-745                       |    | CDD-340430 | 51 |     | Antimycobac Invitro, Invit 12657257, 1265 |
| SMR000326722                  |    | CDD-164631 | 50 |     | -9.77                                     |
| Corticosterone                |    | CDD-1383   | 50 | -50 |                                           |
| SMR000058318                  |    | CDD-1383   | 50 |     | -4.43                                     |
| SMR000111539                  |   | CDD-259994 | 50 |     | -0.99                                     |
| TBL-1248                      |  | CDD-340736 | 50 |     | Antimycobac Invitro, Invit 15497961, 1549 |
| TBL-3893                      |  | CDD-342392 | 50 |     | Antimycobac Invitro 16378375              |
| 209508                        |  | CDD-53407  | 50 |     | 12.0307                                   |
| SMR000058328                  |  | CDD-45851  | 50 |     | -12.2                                     |



|              |                                                                                   |            |    |                                           |
|--------------|-----------------------------------------------------------------------------------|------------|----|-------------------------------------------|
| SMR000440162 | 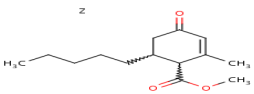 | CDD-239257 | 50 | -5.74                                     |
| SMR000058768 |  | CDD-301527 | 50 | -7.52                                     |
| TBL-1247     |  | CDD-340735 | 50 | Antimycobac Invitro, Invit 15497961, 1549 |

### ESSENTIAL MOLECULE: Glutamate-1-semialdehyde

|                          |                                                                                     |            |     |       |
|--------------------------|-------------------------------------------------------------------------------------|------------|-----|-------|
| Glutamate-1-semialdehyde | 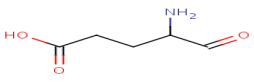   |            | 100 |       |
| L-glutamate              |    | CDD-41783  | 93  |       |
| SMR000033946             |    | CDD-41783  | 93  | 0     |
| Vigabatrin               |   | CDD-1052   | 74  | 0     |
| SMR000102743             |  | CDD-258204 | 68  | -7.02 |
| JHU-5918                 |  | CDD-47339  | 67  |       |
| 692_FDAMDD_v3b           |  | CDD-47990  | 67  |       |
| meso-diaminopimelate     |  |            | 66  |       |

|                      |                                                                                     |            |    |            |
|----------------------|-------------------------------------------------------------------------------------|------------|----|------------|
| SMR000058285         | 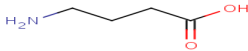   | CDD-14017  | 66 | -5.23      |
| SMR000299536         |    | CDD-221626 | 65 | 0.31       |
| 6-aminohexanoic acid |    | CDD-7      | 64 |            |
| SMR000102742         |    | CDD-161620 | 61 | -9.8       |
| SMR000387093         |    | CDD-170625 | 60 | -15.48     |
| SMR000413942         |    | CDD-297226 | 58 | -8.57      |
| Gabapentin           |    | CDD-297    | 58 | 10         |
| SN-5889              |    | CDD-5133   | 57 |            |
| 5-amino-levulinate   |   | CDD-15328  | 57 |            |
| SMR000471834         |  | CDD-309946 | 55 | -4.9       |
| SMR000131763         |  | CDD-161284 | 55 | 1.27       |
| SMR000326773         |  | CDD-254061 | 54 | -11.86     |
| SMR000278375         |  | CDD-222679 | 53 | 3.53, 4.04 |

|                 |                                                                                    |            |    |     |        |                      |                        |
|-----------------|------------------------------------------------------------------------------------|------------|----|-----|--------|----------------------|------------------------|
| Tranexamic acid |   | CDD-689    | 52 |     |        |                      |                        |
| Tranexamic acid |   | CDD-689    | 52 | -33 |        |                      |                        |
| SMR000338326    |   | CDD-171480 | 52 |     | 1.31   |                      |                        |
| SMR000387065    |   | CDD-255763 | 51 |     | -8.88  |                      |                        |
| SMR000058997    |   | CDD-47114  | 50 |     | -6.59  |                      |                        |
| SMR000112203    |   | CDD-46795  | 50 |     | 7.39   |                      |                        |
| SMR000059164    |   | CDD-61     | 50 |     | -11.58 |                      |                        |
| TBL-1707        |   | CDD-2534   | 50 |     |        | Antimycobact Invitro | 16180806 Mycobacterium |
| TBL-1710        |  | CDD-340981 | 50 |     |        | Antimycobact Invitro | 16180806 Mycobacterium |

**ESSENTIAL MOLECULE: L-2,3-dihydrodipicolinate**

L-2,3-dihydrodipicolinate

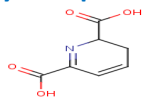

100

SMR000020451

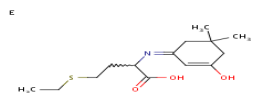

CDD-263791

47

1.38

|              |                                                                                     |            |    |             |
|--------------|-------------------------------------------------------------------------------------|------------|----|-------------|
| SMR000353541 | 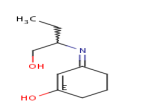   | CDD-215683 | 45 | -3.21, -6.4 |
| SMR000040064 |    | CDD-312894 | 43 | -0.34       |
| SMR000024651 |    | CDD-175568 | 41 | -2.85       |
| SMR000054190 |    | CDD-322314 | 41 | 2.31        |
| SMR000039234 |    | CDD-233144 | 40 | 2.06        |
| SMR000104276 |    | CDD-298570 | 40 | -6.82       |
| SMR000307573 |    | CDD-241078 | 39 | -0.93       |
| SMR000185101 |    | CDD-189451 | 38 | 1.03        |
| SMR000427701 |   | CDD-308769 | 38 | -7.46       |
| SMR000420021 |  | CDD-308909 | 38 | 26.21       |
| SMR000230342 |  | CDD-328799 | 38 | -2.03       |
| SMR000313623 |  | CDD-244042 | 38 | 2.24        |
| SMR000054242 |  | CDD-181719 | 38 | -10.16      |

|              |                                                                                   |            |    |        |
|--------------|-----------------------------------------------------------------------------------|------------|----|--------|
| SMR000420031 | 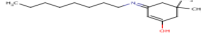 | CDD-275024 | 38 | 16.7   |
| SMR000066118 |  | CDD-263668 | 38 | 1.35   |
| SMR000281857 |  | CDD-264852 | 38 | -1.82  |
| SMR000420020 |  | CDD-199144 | 37 | 3.06   |
| SMR000230885 |  | CDD-247686 | 37 | 0      |
| SMR000105014 |  | CDD-167515 | 37 | -1.1   |
| SMR000427702 |  | CDD-196365 | 37 | -11.46 |
| SMR000037970 |  | CDD-299046 | 37 | 5.39   |
| SMR000450030 |  | CDD-200701 | 37 | 3.96   |
| SMR000054254 |  | CDD-166646 | 37 | -7.71  |
| SMR000104015 |  | CDD-228504 | 37 | -2.62  |
| SMR000105000 |  | CDD-334223 | 36 | 4.96   |
| SMR000103577 |  | CDD-213041 | 36 | -5.03  |

|              |                                                                                     |            |    |        |
|--------------|-------------------------------------------------------------------------------------|------------|----|--------|
| SMR000040276 | 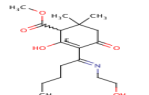   | CDD-234279 | 36 | -0.94  |
| SMR000313622 |    | CDD-241753 | 36 | -8.63  |
| SMR000137201 |    | CDD-192411 | 36 | -0.97  |
| SMR000037713 |    | CDD-210147 | 36 | -17.84 |
| SMR000306744 |    | CDD-190834 | 36 | -3.15  |
| SMR000420277 |    | CDD-201137 | 36 | 1.98   |
| SMR000104082 |    | CDD-213106 | 36 | -1.09  |
| SMR000111406 |    | CDD-213420 | 35 | 1.38   |
| SMR000037858 |   | CDD-160145 | 35 | -6.58  |
| SMR000054234 |  | CDD-335329 | 35 | -10.74 |
| SMR000307265 |  | CDD-244234 | 35 | 2.17   |
| SMR000117846 |  | CDD-244496 | 35 | -0.91  |
| SMR000111392 |  | CDD-159982 | 35 | -2.83  |

|              |                                                                                   |            |    |       |
|--------------|-----------------------------------------------------------------------------------|------------|----|-------|
| SMR000459869 | 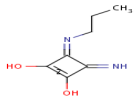 | CDD-310194 | 35 | -0.75 |
| SMR000260499 |  | CDD-192579 | 35 | 4.5   |
| SMR000009444 |  | CDD-233876 | 35 | -0.58 |
| SMR000111367 |  | CDD-213555 | 35 | -5.71 |
| SMR000282638 |  | CDD-307029 | 35 | -5.62 |

### ESSENTIAL MOLECULE: N-succinyl-2-amino-6-ketopimelate

|                             |                                                                                     |            |     |        |
|-----------------------------|-------------------------------------------------------------------------------------|------------|-----|--------|
| N-succinyl-2-amino-6-ketopi | 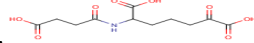   |            | 100 |        |
| SMR000326657                |   | CDD-327150 | 81  | -8.05  |
| SMR000033650                |  | CDD-165697 | 70  | -0.61  |
| 7260818                     |  | CDD-134390 | 69  | -3.7   |
| SMR000135311                |  | CDD-258631 | 69  | 0.34   |
| 5219863                     |  | CDD-130340 | 69  | -11.35 |

|              |                                                                                     |            |    |        |
|--------------|-------------------------------------------------------------------------------------|------------|----|--------|
| SMR000365399 | 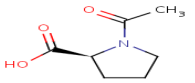   | CDD-61098  | 68 | 0.28   |
| SMR000132615 |    | CDD-326812 | 68 | 1.77   |
| SMR000123689 |    | CDD-56280  | 68 | -1.02  |
| SMR000132432 |    | CDD-168599 | 67 | 2.15   |
| SMR000393684 |    | CDD-197851 | 67 | -3.18  |
| SMR000174810 |    | CDD-164142 | 67 | -6.9   |
| SMR000174809 |    | CDD-318181 | 67 | 2.58   |
| SMR000174804 |    | CDD-215976 | 66 | -0.28  |
| SMR000231097 |   | CDD-150148 | 66 | -0.65  |
| SMR000069591 |  | CDD-160080 | 65 | -11.92 |
| SMR000230597 |  | CDD-169447 | 65 | -7.92  |
| SMR000145131 |  | CDD-146894 | 64 | -2.49  |
| 7830870      |  | CDD-145234 | 64 | 4.21   |



|              |                                                                                     |            |    |    |        |
|--------------|-------------------------------------------------------------------------------------|------------|----|----|--------|
| SMR000174803 |    | CDD-282104 | 64 |    | -3.38  |
| SMR000064358 |    | CDD-159991 | 63 |    | -7.6   |
| SMR000174802 |    | CDD-247398 | 63 |    | 2.6    |
| SMR000010722 |    | CDD-173740 | 63 |    | 0.33   |
| SMR000135210 |    | CDD-209039 | 62 |    | -2.17  |
| SMR000102736 |    | CDD-160025 | 62 |    | -1.41  |
| Captopril    |    | CDD-1069   | 62 | 10 |        |
| SMR000059061 |    | CDD-1069   | 62 |    | -12.15 |
| 7561067      |   | CDD-145987 | 61 |    | 2.56   |
| CDD-62786    |  | CDD-62786  | 60 |    |        |
| SMR000298068 |  | CDD-240528 | 60 |    | -6.98  |
| SMR000368756 |  | CDD-59139  | 60 |    | -6.48  |
| SMR000039488 |  | CDD-234078 | 60 |    | 0.62   |

|              |                                                                                     |            |    |                       |
|--------------|-------------------------------------------------------------------------------------|------------|----|-----------------------|
| SMR000033651 | 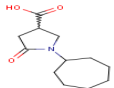   | CDD-207106 | 60 | 3.4                   |
| SMR000528201 |    | CDD-200110 | 60 | -8.77                 |
| SMR000425587 |    | CDD-221604 | 60 | -3.1                  |
| SMR000425585 |    | CDD-321276 | 60 | -1.09                 |
| SMR000054202 |    | CDD-322035 | 60 | -2.39                 |
| TBL-2523     |    | CDD-341652 | 59 | Inhibition of Invitro |
| SMR000282195 |    | CDD-219073 | 59 | -9.6                  |
| 7734680      |    | CDD-131947 | 58 | 3.09                  |
| 7823679      |   | CDD-131606 | 58 | -1.12                 |
| SMR000012122 |  | CDD-311196 | 58 | 0.37                  |
| SMR000062190 |  | CDD-159948 | 58 | -3.59                 |
| CDD-63657    |  | CDD-63657  | 58 |                       |
| SMR000273088 |  | CDD-57025  | 58 | -0.6                  |

|              |                                                                                   |            |    |       |
|--------------|-----------------------------------------------------------------------------------|------------|----|-------|
| SMR000034328 | 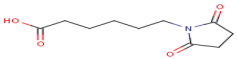 | CDD-117027 | 58 | 1.58  |
| SMR000471611 |  | CDD-168517 | 57 | -8.65 |
| 7408566      |  | CDD-134674 | 57 | -1.22 |
| SMR000009416 |  | CDD-160151 | 57 | -3.76 |
| 7365320      |  | CDD-134616 | 57 | -2.8  |

**ESSENTIAL MOLECULE: 2-keto-isovalerate**

|                    |                                                                                     |            |     |       |
|--------------------|-------------------------------------------------------------------------------------|------------|-----|-------|
| 2-keto-isovalerate | 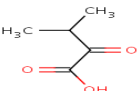   |            | 100 |       |
| SMR000471861       |    | CDD-128597 | 56  | -8.46 |
| SMR000413942       |  | CDD-297226 | 55  | -8.57 |
| SMR000499581       |  | CDD-717    | 54  | 14.81 |
| SMR000471834       |  | CDD-309946 | 52  | -4.9  |
| SMR000386957       |  | CDD-42709  | 50  | 9.95  |

|              |                                                                                     |            |    |         |
|--------------|-------------------------------------------------------------------------------------|------------|----|---------|
| 17699        | 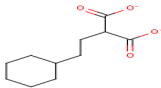   | CDD-53608  | 49 | 14.7    |
| 17609        |    | CDD-53758  | 49 | 16.8387 |
| SMR000127417 |    | CDD-255913 | 49 | 6.65    |
| SMR000528042 |    | CDD-200173 | 48 | -9.81   |
| 17612        |    | CDD-53378  | 48 | 11.6665 |
| SMR000326773 |    | CDD-254061 | 48 | -11.86  |
| SMR000113247 |    | CDD-322745 | 48 | -5.43   |
| SMR000019012 |    | CDD-338808 | 48 | -15.89  |
| SMR000137563 |   | CDD-209399 | 47 | -0.15   |
| SMR000054379 |  | CDD-298250 | 47 | -1.21   |
| 17610        |  | CDD-54322  | 46 | 31.4245 |
| SMR000058285 |  | CDD-14017  | 46 | -5.23   |
| SMR000112203 |  | CDD-46795  | 46 | 7.39    |

|                       |                                                                                     |            |    |    |         |                              |
|-----------------------|-------------------------------------------------------------------------------------|------------|----|----|---------|------------------------------|
| SMR000059164          |    | CDD-61     | 46 |    | -11.58  |                              |
| TBL-1707              |    | CDD-2534   | 46 |    |         | Antimycobac Invitro 16180806 |
| TBL-1710              |    | CDD-340981 | 46 |    |         | Antimycobac Invitro 16180806 |
| anhydrous citric acid |    | CDD-48     | 45 |    |         |                              |
| SMR000471840          |    | CDD-48     | 45 |    | -0.98   |                              |
| Dehydrocholic acid    |    | CDD-1147   | 44 | 10 |         |                              |
| SMR000058603          |    | CDD-1147   | 44 |    | -1.56   |                              |
| SMR000019054          |    | CDD-2665   | 44 |    | -11.27  |                              |
| SMR000058580          |   | CDD-212241 | 44 |    | -0.89   |                              |
| SMR000499572          |  | CDD-315415 | 44 |    | 9.68    |                              |
| SMR000141220          |  | CDD-180159 | 44 |    | -5.64   |                              |
| SMR000102400          |  | CDD-311365 | 43 |    | -4.33   |                              |
| 110597                |  | CDD-53000  | 43 |    | 7.05746 |                              |

|                             |                                                                                     |            |    |         |                              |
|-----------------------------|-------------------------------------------------------------------------------------|------------|----|---------|------------------------------|
| 110596                      | 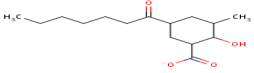   | CDD-53864  | 43 | 18.5625 |                              |
| 110595                      |    | CDD-54402  | 43 | 37.1249 |                              |
| SMR000074082                |    | CDD-205425 | 43 | -1.24   |                              |
| SMR000054222                |    | CDD-264022 | 42 | -0.89   |                              |
| SMR000054383                |    | CDD-156070 | 41 | 2.58    |                              |
| Mevalonic-D, L acid lactone |    | CDD-1651   | 41 | -22     |                              |
| SMR000528036                |    | CDD-150659 | 41 | -3.78   |                              |
| Gabapentin                  |    | CDD-297    | 40 | 10      |                              |
| Tranexamic acid             |   | CDD-689    | 40 |         |                              |
| Tranexamic acid             |  | CDD-689    | 40 | -33     |                              |
| 95069                       |  | CDD-54519  | 40 | 75.0801 |                              |
| TBL-1709                    |  | CDD-340980 | 40 |         | Antimycobac Invitro 16180806 |
| 6-aminohexanoic acid        |  | CDD-7      | 40 |         |                              |

**ESSENTIAL MOLECULE: N-acetylmuramoyl-L-alanyl-D-glutamyl-meso-2,6-diaminopimelyl-D-alanyl-D-alanine-diphosphoundecaprenyl-N-acetylglucosamine**

|                             |                                                                                                |  |     |             |
|-----------------------------|------------------------------------------------------------------------------------------------|--|-----|-------------|
| N-acetylmuramoyl-L-alanyl-L | 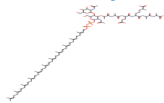              |  | 100 |             |
| UDP-N-acetylmuramoyl-L-al   |               |  | 68  |             |
| SMR000274374                |  CDD-308218   |  | 61  | 2.76        |
| SMR000312992                |  CDD-332324   |  | 61  | 4.53        |
| UDP-N-acetyl-muramate       |               |  | 61  |             |
| SMR000312993                |  CDD-168956   |  | 60  | -7.3, -2.69 |
| UDP-GlcNAc-enol pyruvate    |              |  | 60  |             |
| SMR000466356                |  CDD-653    |  | 59  | -2.63       |
| SMR000127507                |  CDD-164290 |  | 59  | 5.69        |
| SMR000312920                |  CDD-241500 |  | 59  | 2.71        |
| UDP-N-acetyl-D-glucosamine  |             |  | 58  |             |

|          |                                                                                     |            |    |         |                               |             |               |
|----------|-------------------------------------------------------------------------------------|------------|----|---------|-------------------------------|-------------|---------------|
| TBL-8796 | 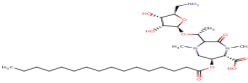   | CDD-344703 | 57 |         | Antimycobact: Invitro         | 18375127    | Mycobacterium |
| 337554   |    | CDD-51939  | 57 | 0.67926 |                               |             |               |
| 337555   |    | CDD-51946  | 57 | 0.68766 |                               |             |               |
| 337553   |    | CDD-52135  | 57 | 1.34213 |                               |             |               |
| TBL-6222 |    | CDD-343099 | 57 |         | Antimycobact: Invitro, Invitr | 18375127, : | Mycobacterium |
| TBL-6224 |    | CDD-343101 | 57 |         | Antimycobact: Invitro, Invitr | 18375127, : | Mycobacterium |
| 181984   |    | CDD-52136  | 56 | 1.34213 |                               |             |               |
| 337556   |    | CDD-52150  | 56 | 1.37532 |                               |             |               |
| TBL-6223 |   | CDD-343100 | 56 |         | Antimycobact: Invitro, Invitr | 18375127, : | Mycobacterium |
| TBL-8792 |  | CDD-343768 | 56 |         | Antimycobact: Invitro         | 18375127    | Mycobacterium |
| 181972   |  | CDD-52012  | 56 | 0.95711 |                               |             |               |
| 181971   |  | CDD-52031  | 56 | 1.02788 |                               |             |               |
| TBL-8793 |  | CDD-343995 | 56 |         | Antimycobact: Invitro         | 18375127    | Mycobacterium |



181975

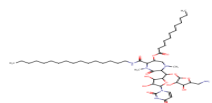

CDD-52500

55 3.18316

181976

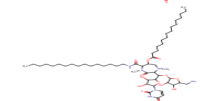

CDD-52885

55 6.01304

SMR000440621

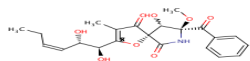

CDD-163045

55 -6.03
