# Supplementary material for: Essential Metabolites of Mycobacterium tuberculosis and Their Mimics
Source: PubMed Central journal article supplement — mBio. 2011 Feb 1;2(1):e00301-10. doi: 10.1128/mBio.00301-10 (PMC3031304; doi:10.1128/mbio.00301-10), 2011-02-01

### Supplemental table 3

#### ESSENTIAL MOLECULES OF TETRAPYRROLE BIOSYNTHESIS PATHWAY IN MTB

L-glutamate

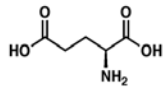

Glutamate-1-semialdehyde

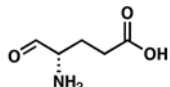

5-amino-levulinate

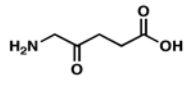

Porphobilinogen

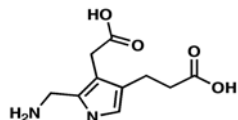

Hydroxymethylbilane

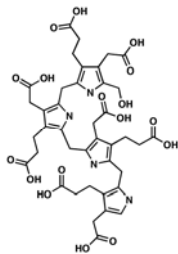

Supplement: mBio00301-10-s05.pdf [file mBio00301-10-s05.pdf]
