# Supplementary material for: Essential Metabolites of Mycobacterium tuberculosis and Their Mimics
Source: PubMed Central journal article supplement — mBio. 2011 Feb 1;2(1):e00301-10. doi: 10.1128/mBio.00301-10 (PMC3031304; doi:10.1128/mbio.00301-10), 2011-02-01
Supplement: mBio00301-10-s06.pdf [file mBio00301-10-s06.pdf]

## Supplemental table 4

### Molecules with chemical similarity to L-glutamate that failed to inhibit growth of *Mtb*.

|                                                                                   |                                                                                   |                                                                                   |                                                                                    |                                                                                     |
|-----------------------------------------------------------------------------------|-----------------------------------------------------------------------------------|-----------------------------------------------------------------------------------|------------------------------------------------------------------------------------|-------------------------------------------------------------------------------------|
| Gabapentin                                                                        | SYN17234197                                                                       | SYN17939026                                                                       | SYN15425064                                                                        | SEW04564SC                                                                          |
| 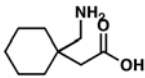 |  |  |  |  |
| NRB04468SC                                                                        | DFP00008SC                                                                        | BTB13551SC                                                                        | M7033                                                                              | B2515                                                                               |
|  |  |  |  |  |
